# Supplementary material
Source: PubMed Central journal article supplement (PMC3612528)
Supplement: NIHMS441326-supplement-1.pdf [file NIHMS441326-supplement-1.pdf]

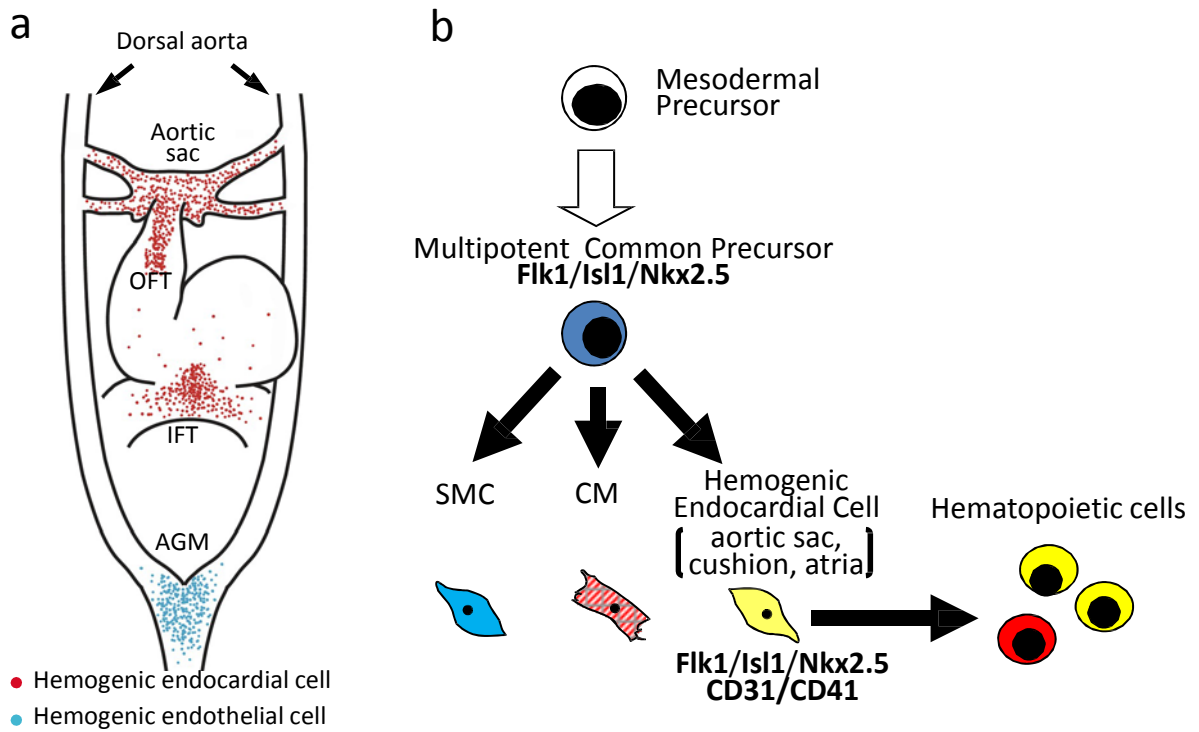

**Supplementary Figure S1: Model for developmental pathway of hemogenic endocardium**

**a.** Distribution of hemogenic endocardial cells. Cardiovascular system at around E9.5 in mouse embryo. CD41<sup>+</sup> endocardial cells (red dots) are clustered in the endocardium of outflow tract (OFT) cushion, aortic sac, aortic arches, and dorsal mesocardium in inflow tract (IFT). Blue dots indicate hemogenic endothelial cells that emerge shortly after. **b.** Model for diversification of cardio-vasculo-hematopoietic lineages in the heart tube. Putative common precursor cells expressing *Flk1/Isl1/Nkx2-5* give rise to cardio-vasculo-hematopoietic lineages.

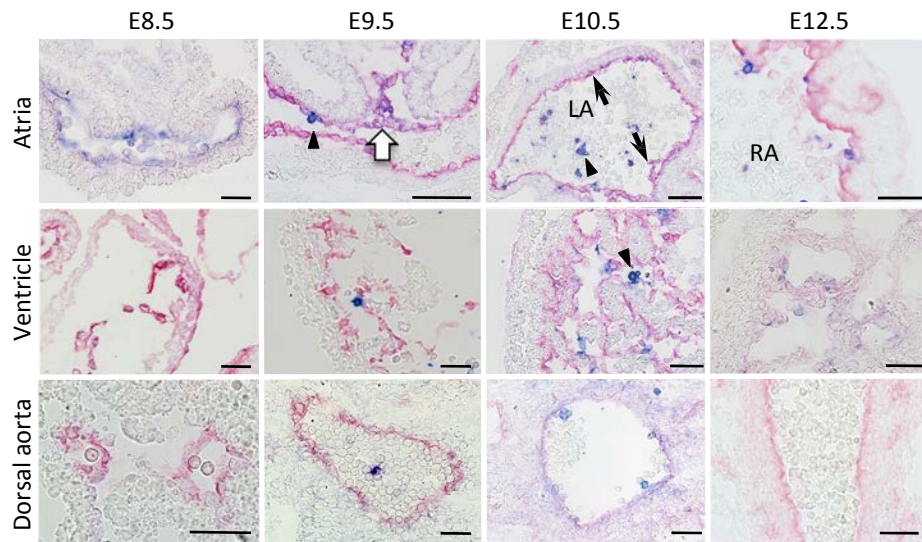

**Supplementary Figure S2: Time course of CD41 expression in the endocardium**

Expression of CD41 (blue) and CD31 (red) in the heart and dorsal aorta are examined at different stages. Black arrows indicate CD41<sup>+</sup> putative hematopoietic progenitors emerging in the endocardium. White arrow indicates a cluster of CD41<sup>+</sup> cells in the dorsal wall of atrial endocardium. Arrowheads indicate circulating CD41<sup>+</sup> hematopoietic progenitors. Note that CD41<sup>+</sup> cells are found at E8.5 in the endocardium, but not until E10.5 in the dorsal aorta. LA, left atrium; RA, right atrium. Scale bars = 50 $\mu$ m.

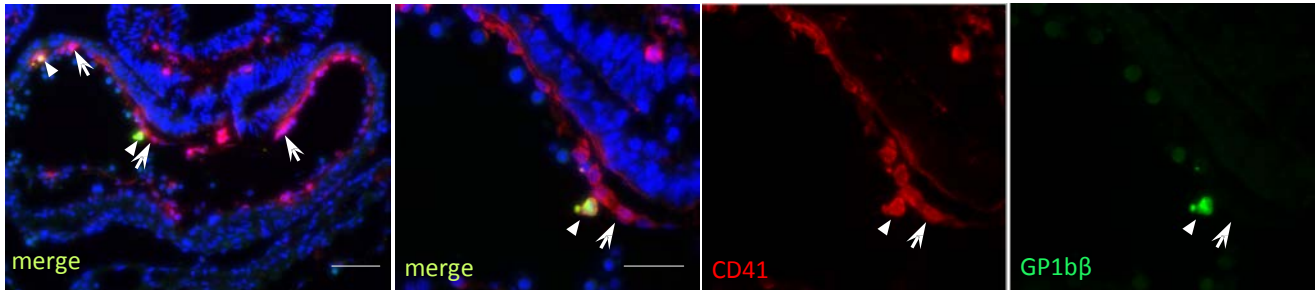

**Supplementary Figure S3: Majority of CD41<sup>+</sup> endocardial cells are non-megakaryocytes/platelets**

E9.5 atrium is stained for CD41 (red), GP1b $\beta$  (megakaryocyte/platelet marker, green) and DAPI (blue). Majority of CD41<sup>+</sup> cells are GP1b $\beta$  negative (arrows). Arrowheads indicate double positive megakaryocyte/platelets. Scale bar = 50 $\mu$ m (low magnification, far left), 25 $\mu$ m (high magnification).

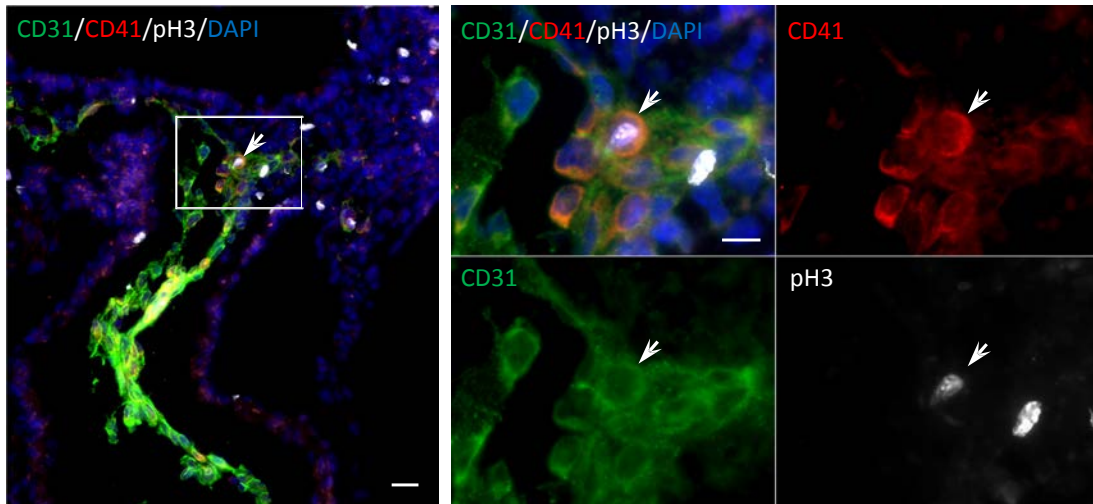

**Supplementary Figure S4: CD41<sup>+</sup> endocardial cell is proliferating *in situ*.**

E9.5 OFT stained for CD31 (green), CD41 (red), phospho-histone H3 (pH3, mitosis marker, white) and DAPI (blue). Four right panels are the higher magnification of the broken-lined area of the left panel, showing the mitotic activity of a CD31<sup>+</sup>/CD41<sup>+</sup> cell *in situ* (arrow). Scale bar=20 $\mu$ m (low magnification on the left), 10 $\mu$ m (high magnification on the right).

a

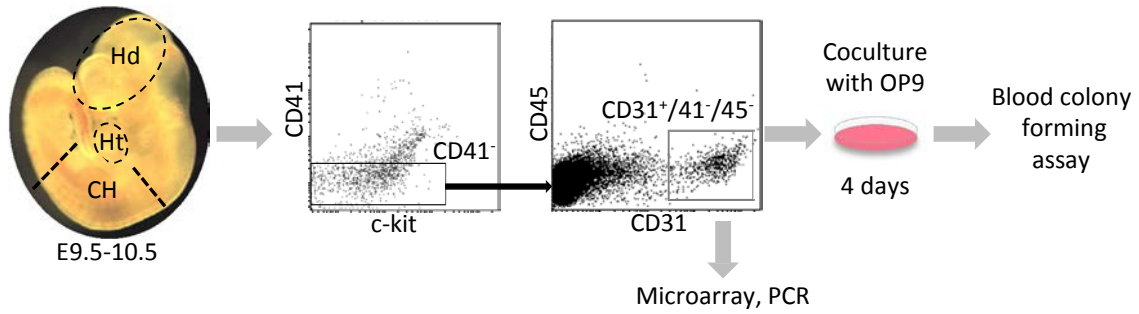

b

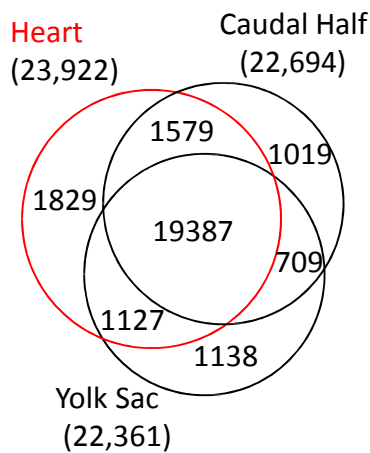

c

| GO Term                                               | Gene Counts | P-Value     |
|-------------------------------------------------------|-------------|-------------|
| vasculature development                               | 180         | 6.91E-10    |
| blood vessel morphogenesis                            | 144         | 1.42E-08    |
| cardiac muscle tissue development                     | 46          | 3.85E-05    |
| nitrogen compound biosynthetic process                | 192         | 1.35E-04    |
| heart morphogenesis                                   | 54          | 7.16E-04    |
| striated muscle tissue development                    | 84          | 0.002713695 |
| vasculogenesis                                        | 33          | 0.003024326 |
| erythrocyte homeostasis                               | 38          | 0.003109244 |
| erythrocyte differentiation                           | 36          | 0.003482675 |
| ion transmembrane transport                           | 32          | 0.004334291 |
| cardiac muscle tissue morphogenesis                   | 16          | 0.007322665 |
| T cell homeostasis                                    | 16          | 0.007322665 |
| striated muscle cell differentiation                  | 59          | 0.012083208 |
| cardiac muscle cell differentiation                   | 22          | 0.01371367  |
| hemopoiesis                                           | 149         | 0.037078145 |
| heart process                                         | 12          | 0.045265731 |
| regulation of striated muscle cell differentiation    | 17          | 0.046617841 |
| positive regulation of mesenchymal cell proliferation | 17          | 0.046617841 |
| endothelial cell migration                            | 10          | 0.048671774 |

d

| GO Term                                             | Gene Counts | P-Value     | Genes                                                                                                                  |
|-----------------------------------------------------|-------------|-------------|------------------------------------------------------------------------------------------------------------------------|
| regulation of myeloid cell differentiation          | 8           | 0.001080522 | tal1, hmgb3, hif1a, ldb1, stat5b, tcf3, rbm15, cttnb1                                                                  |
| negative regulation of myeloid cell differentiation | 5           | 0.003923182 | hmgb3, ldb1, stat5b, rbm15, cttnb1                                                                                     |
| regulation of erythrocyte differentiation           | 4           | 0.005667524 | tal1, hif1a, ldb1, stat5b                                                                                              |
| hemopoietic or lymphoid organ development           | 18          | 0.008577517 | xrcc5, stat5b, kif11, smad5, brca2, nfkb1, cbfb, cttnb1, tal1, hif1a, sp1, sp3, ncoa6, tcea1, rbpj, rbm15, mll1, myst3 |
| myeloid cell differentiation                        | 9           | 0.011337791 | tal1, sp1, sp3, ncoa6, smad5, tcea1, cbfb, cttnb1, myst3                                                               |
| hemopoiesis                                         | 16          | 0.014502957 | xrcc5, stat5b, kif11, smad5, brca2, cbfb, cttnb1, tal1, hif1a, sp1, sp3, ncoa6, tcea1, rbpj, mll1, myst3               |
| embryonic hemopoiesis                               | 3           | 0.038326446 | hif1a, mll1, myst3                                                                                                     |
| definitive hemopoiesis                              | 3           | 0.038326446 | sp1, sp3, cbfb                                                                                                         |
| erythrocyte differentiation                         | 5           | 0.065534548 | tal1, sp1, sp3, smad5, tcea1                                                                                           |
| erythrocyte homeostasis                             | 5           | 0.078276977 | tal1, sp1, sp3, smad5, tcea1                                                                                           |

e

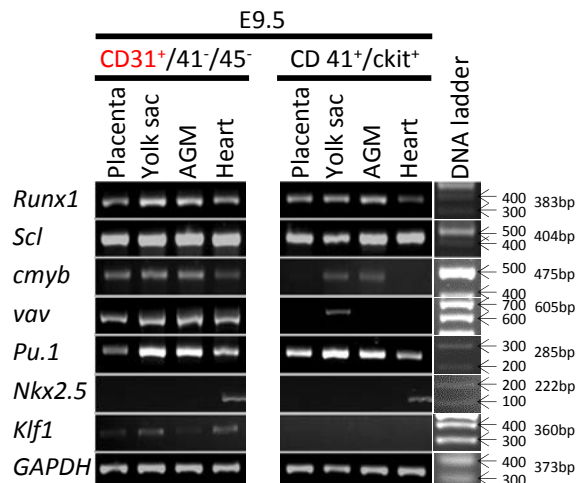

**Supplementary Figure S5: Genes expression of FACS-purified endocardial/endothelial cells**

**a.** Schematic representation of the FACS purification procedure. As CD31 is expressed in a fraction of circulating hematopoietic progenitors, local endocardial cells were sorted as CD31<sup>+</sup>/41<sup>-</sup>/45<sup>-</sup> population from the heart. **b.** Venn diagram of the gene probes in CD31<sup>+</sup>/41<sup>-</sup>/45<sup>-</sup> population from the heart, caudal half, and yolk sac. **c.** Gene Ontology (GO) analysis of 23,922 genes expressed in the FACS-purified endocardial cells. **d.** Gene Ontology analysis of 481 transcription factors commonly expressed in FACS-purified endocardial/endothelial cells from the heart tube and caudal half at similar levels (within 1.5-fold from each other). See Supplementary Table 2 for the full list of 481 transcription factors. Genes related to hematopoiesis with p-value of 0.01 or less are listed. **e.** Expression of hematopoietic genes are demonstrated by RT-PCR using sorted endocardial/endothelial (CD31<sup>+</sup>/CD41<sup>-</sup>/CD45<sup>-</sup>), and hematopoietic progenitor (CD41<sup>+</sup>/ckit<sup>+</sup>) cell population.

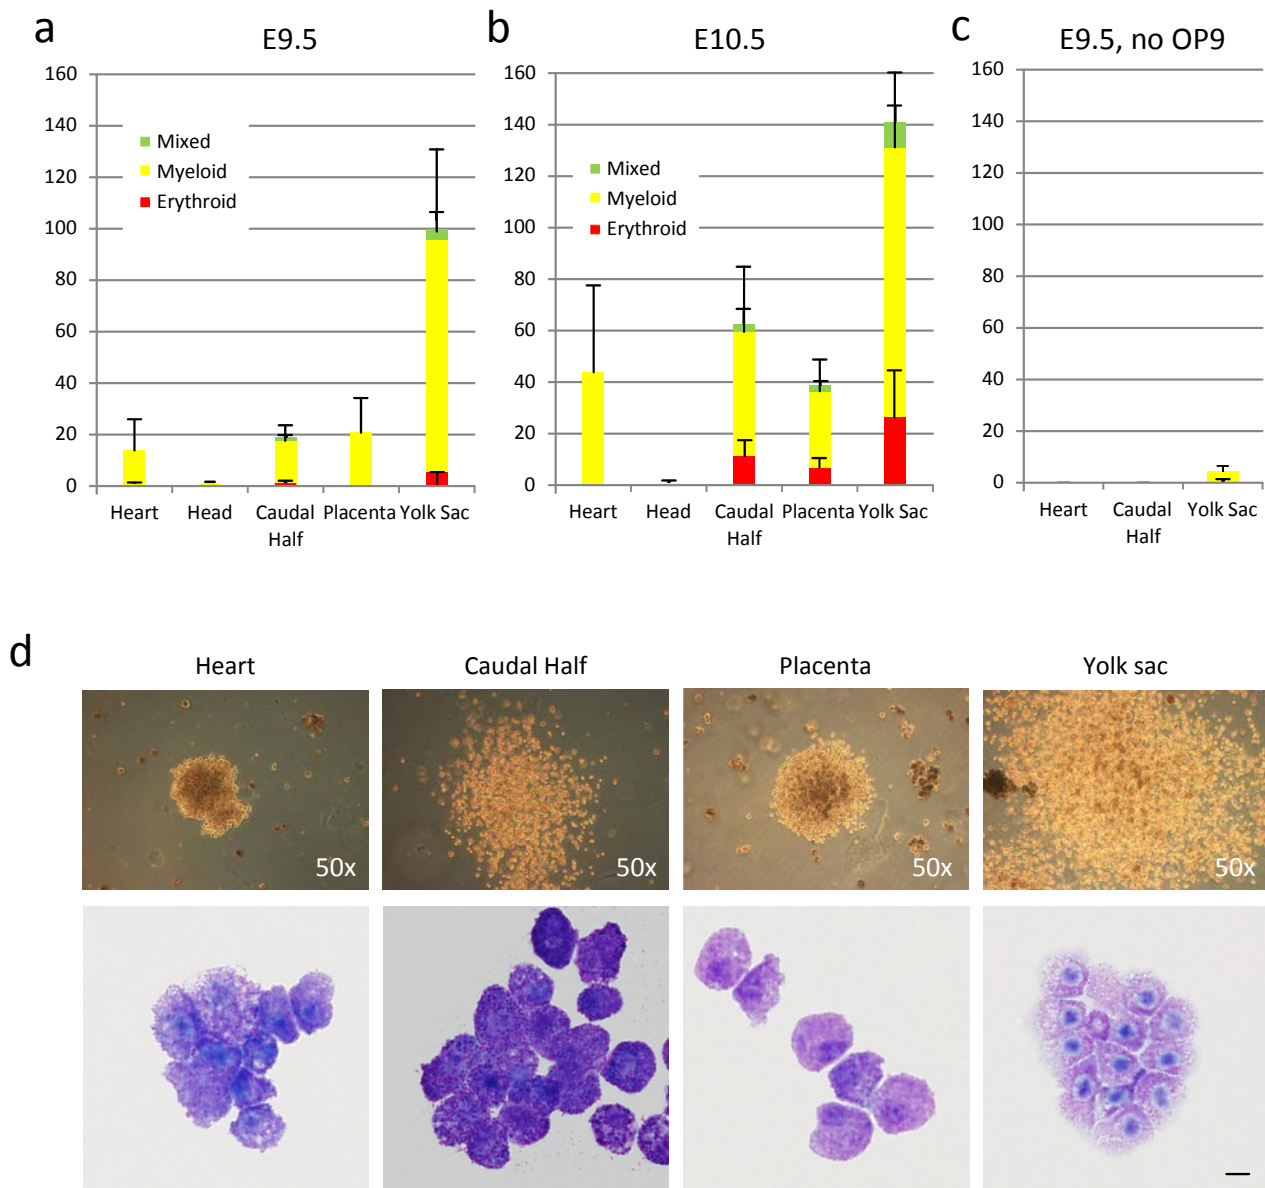

**Supplementary Figure S6: Colony forming assay from FACS-purified endocardial/endothelial cells**

**a, b.** OP9/Colony forming assay from CD31<sup>+</sup>/41<sup>-</sup>/45<sup>-</sup> population from different organs at E9.5 (**a**) and 10.5 (**b**). Mean±SEM. **c.** Colony forming assay without OP9 coculture. The numbers represent the colonies per embryo equivalent from each tissue. **c.** CD31<sup>+</sup>/41<sup>-</sup>/45<sup>-</sup> cells hardly yielded hematopoietic colony in the absence of OP9 feeder. Mean±SEM. **d.** Microscopic images of representative myeloid colonies from sorted endocardial/endothelial cells from different tissues (upper panels, 50x magnification) and May-Giemsa staining of the cells collected from the corresponding colony (lower panels).

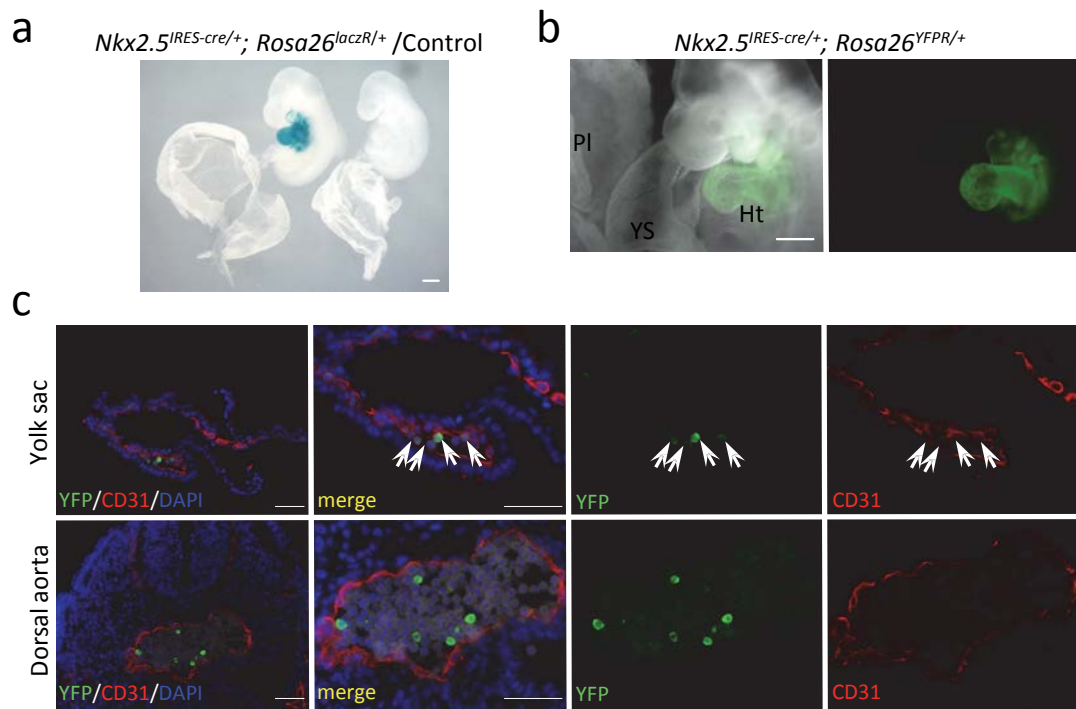

### Supplementary Figure S7 : Lineage tracing of $Nkx2.5^+$ cells

**a.**  $Nkx2.5^{IRES-cre/+}; Rosa26^{lacZR/+}$  embryo at E9.5 and its control littermate ( $Nkx2.5^{+/+}; Rosa26^{lacZR/+}$ ) stained with Xgal. Scale bar = 250 $\mu$ m. **b.**  $Nkx2.5^{IRES-cre/+}; Rosa26^{YFP/+}$  embryo at E9.5 observed under fluorescent microscope. Labeled cells were hardly detected in placenta (PI), or yolk sac (YS) at this magnification. Scale bar = 250 $\mu$ m. **c.** Sections of  $Nkx2.5^{IRES-cre/+}; Rosa26^{YFP/+}$  embryo at E9.5 stained for YFP and CD31. Several endothelial cells are costained for YFP in the yolk sac on the section (upper panels, white arrows). Endothelial cells in the dorsal aorta were not YFP positive, although some circulating cells are positive for YFP. Scale bar = 50 $\mu$ m.



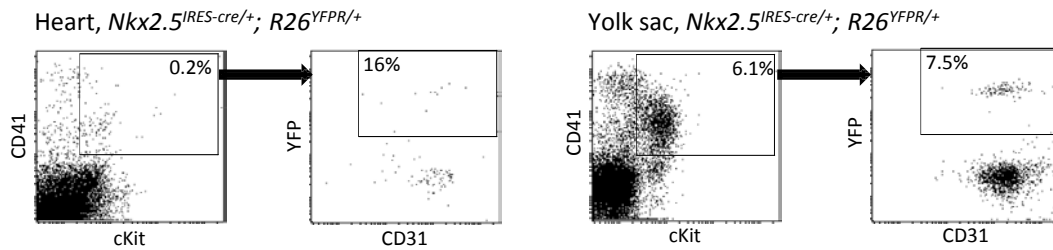

**Supplementary Figure S8: *Nkx2-5*<sup>+</sup> cells contribute to CD41<sup>+</sup>/c-kit<sup>+</sup> cell population in the heart tube and yolk sac**

FACS analyses from *Nkx2.5<sup>IRES-cre/+</sup>; R26<sup>YFP/+</sup>* heart tube and yolk sac at E9.5. 0.2% of the total cells in the heart tube were CD41<sup>+</sup>/c-kit<sup>+</sup>, among which 16% were derived from *Nkx2-5*<sup>+</sup> cells.

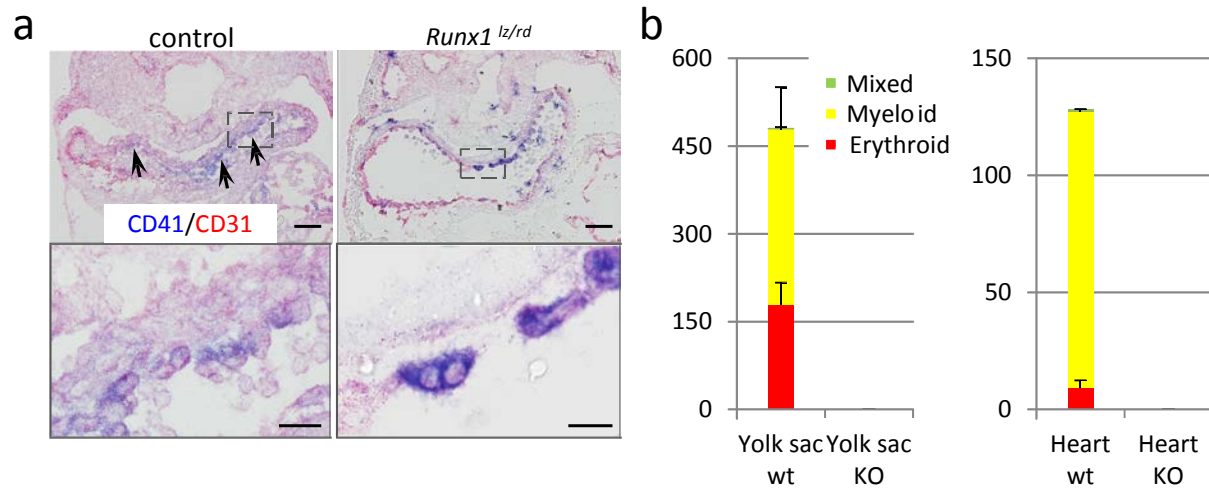

**Supplementary Figure S9: CD41 expression in the endocardium of *Runx1* null embryo**

**a.** Expression of CD41 (blue) and CD31 (red) in the wild-type and *Runx1<sup>lz/rd</sup>* (null) heart at E9.5. Black arrows indicate CD41<sup>+</sup> putative hematopoietic progenitors emerging in the endocardium. Scale bars = 100 $\mu$ m (low magnification), 25 $\mu$ m (high magnification). **b.** Colony formation assay from endocardial cells sorted from wild-type and *Runx1* mutant tissues. No colony was formed from

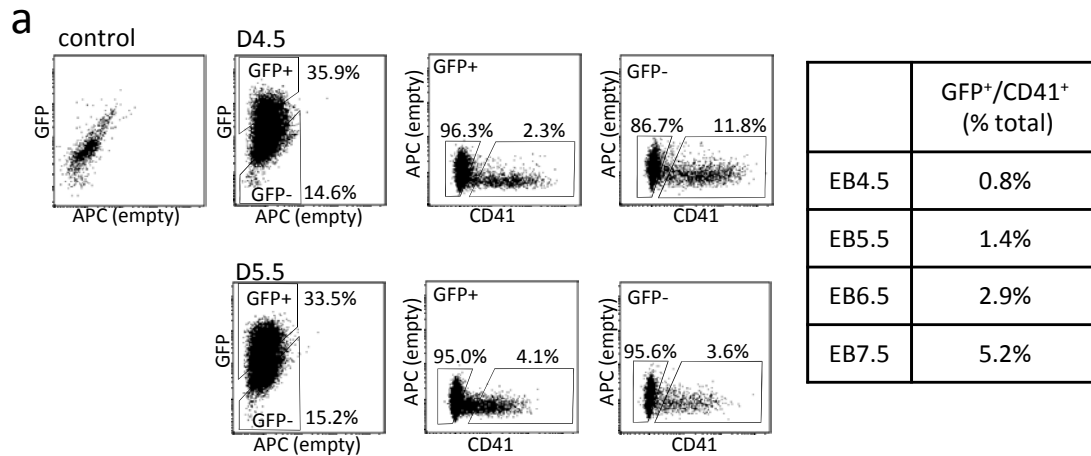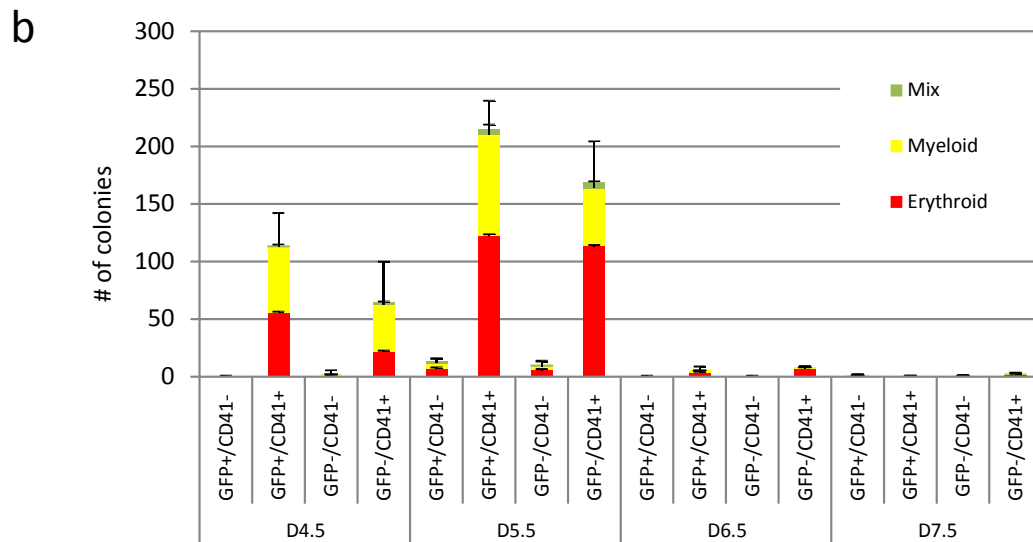

**Supplementary Figure S10 : Isolation of Nkx2.5<sup>+</sup> hematopoietic cells from mouse ES cells**

**a.** FACS profiling of embryoid bodies generated from Nkx2-5-GFP transgenic ES cells. Wild-type E14tg2a ES cell line was used as a control. **b.** Colony formation from GFP<sup>+</sup>/CD41<sup>+</sup> cells. 20,000 of sorted cells were co-cultured on OP9 for 4 days followed by methylcellulose culture in the presence of cytokines. Note that GFP<sup>+</sup>/CD41<sup>+</sup> cells from day 4.5 and 5.5 embryoid bodies formed erythroid, myeloid and mixed colonies. Although GFP<sup>+</sup>/CD41<sup>+</sup> cells were also identified at day 6.5 and 7.5, they did not efficiently form blood colonies. Mean±SEM.

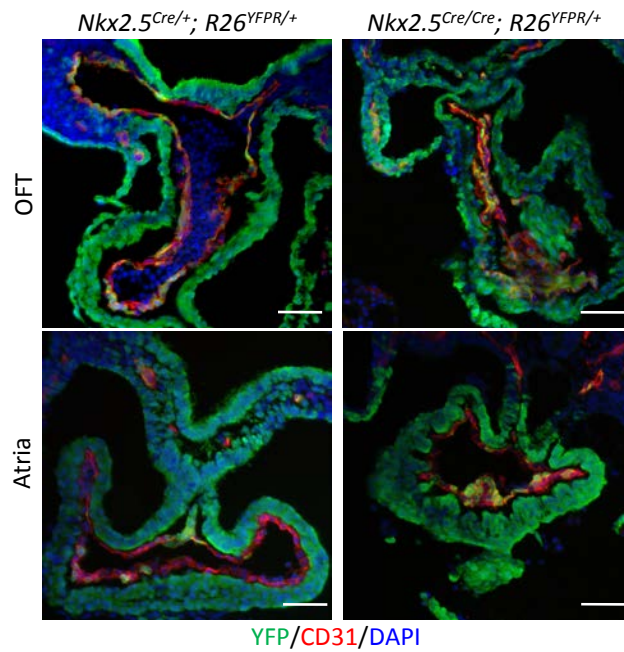

**Supplementary Figure S11: Nkx2-5-driving cells migrate to the endocardium in the absence of Nkx2-5.**

Nkx2-5 lineage was traced in Nkx2-5-hetero (left panels) and null (right panels) background. YFP<sup>+</sup> endocardial cells were identified in the outflow tract and atria of  $Nkx2.5^{Cre/Cre}; R26^{YFP/+}$  embryo at E9.5. Scale bars = 100 $\mu$ m.

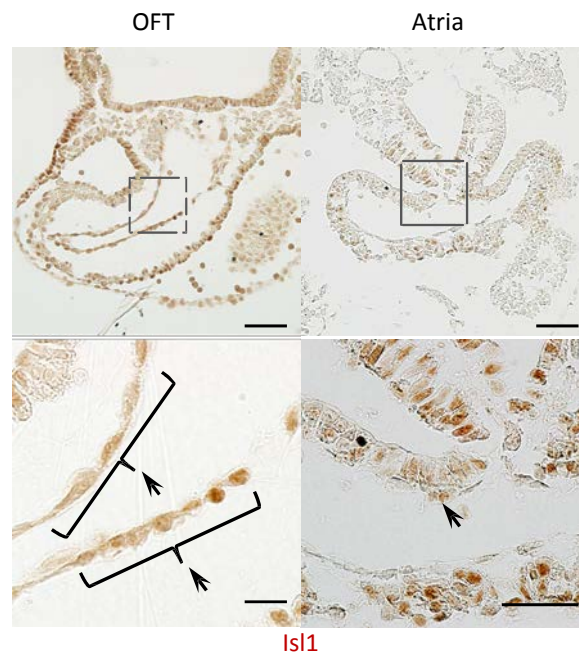

**Supplementary Figure S12 : Expression of Isl1 in the outflow cushion and atrial endocardium.**

Wild-type heart was stained for Isl1. Note that Isl1 is expressed in a subset of the outflow cushion and atrial endocardium. Scale bar = 100 $\mu$ m (low magnification, upper panels), 50  $\mu$ m (high magnification, lower panels).

Supplementary Table S1. 149 genes expressed in endocardium related to hemopoiesis including 38 transcription factors.

| Gene Symbol    | Gene Name                                                                             | Normalized Expression Value<br>in wt control endocardium |
|----------------|---------------------------------------------------------------------------------------|----------------------------------------------------------|
| ACIN1          | apoptotic chromatin condensation inducer 1                                            | 2749.4855                                                |
| ada            | adenosine deaminase                                                                   | 435.7501                                                 |
| Adam17         | a disintegrin and metallopeptidase domain 17                                          | 1258.87                                                  |
| Add1           | adducin 1 (alpha)                                                                     | 783.38435                                                |
| add2           | adducin 2 (beta)                                                                      | 187.27925                                                |
| AHCTF1         | AT hook containing transcription factor 1                                             | 555.4982                                                 |
| APC            | similar to adenomatosis polyposis coli; adenomatosis polyposis coli                   | 2153.7665                                                |
| ATP6V0A1       | ATPase, H+ transporting, lysosomal V0 subunit A1                                      | 406.87415                                                |
| ATP7A          | ATPase, Cu++ transporting, alpha polypeptide                                          | 1547.0125                                                |
| AY036118       | cDNA sequence AY036118                                                                | 34511.48                                                 |
| Bak1           | BCL2-antagonist/killer 1                                                              | 1159.5475                                                |
| BAX            | BCL2-associated X protein                                                             | 926.95775                                                |
| BCL11A         | B-cell CLL/lymphoma 11A (zinc finger protein)                                         | 116.291375                                               |
| BCL11B         | B-cell leukemia/lymphoma 11B                                                          | 129.879465                                               |
| BCL2           | predicted gene 3655; B-cell leukemia/lymphoma 2                                       | 333.37895                                                |
| Bcl3           | B-cell leukemia/lymphoma 3                                                            | 75.06171                                                 |
| BCL6           | B-cell leukemia/lymphoma 6                                                            | 102.39338                                                |
| Blm            | Bloom syndrome homolog (human)                                                        | 704.49815                                                |
| BMP4           | bone morphogenetic protein 4                                                          | 447.81605                                                |
| BPGM           | 2,3-bisphosphoglycerate mutase                                                        | 211.89                                                   |
| Brca2          | breast cancer 2                                                                       | 485.9751                                                 |
| CACNB4         | calcium channel, voltage-dependent, beta 4 subunit                                    | 47.885825                                                |
| CASP8          | caspase 8                                                                             | 741.8728                                                 |
| Cbfa2t3        | core-binding factor, runt domain, alpha subunit 2, translocated to, 3 (human)         | 66.984465                                                |
| Cbfb           | core binding factor beta                                                              | 5272.682                                                 |
| Cd1d1          |                                                                                       | 118.19585                                                |
| Cd1d2          | CD1d1 antigen; CD1d2 antigen                                                          | 32.786177                                                |
| Cd24a          | CD24a antigen                                                                         | 9950.181                                                 |
| Cdk6           | cyclin-dependent kinase 6                                                             | 424.4338                                                 |
| CEBPG          | CCAAT/enhancer binding protein (C/EBP), gamma                                         | 187.82665                                                |
| CHUK           | conserved helix-loop-helix ubiquitous kinase                                          | 1044.1128                                                |
| CIAPIN1        | cytokine induced apoptosis inhibitor 1                                                | 313.34125                                                |
| CRIP2          | cysteine rich protein 2                                                               | 2185.1085                                                |
| CTNNB1         | catenin (cadherin associated protein), beta 1                                         | 1524.8435                                                |
| DCLRE1C        | DNA cross-link repair 1C, PSO2 homolog (S. cerevisiae) DnaJ                           | 92.94306                                                 |
| DNAJA3         | (Hsp40) homolog, subfamily A, member 3 phenylalkylamine                               | 1057.3835                                                |
| EBP            | Ca2+ antagonist (emopamil) binding protein early growth response 1                    | 416.26115                                                |
| Egr1           |                                                                                       | 1759.631                                                 |
| Epas1          | endothelial PAS domain protein 1; similar to Endothelial PAS domain protein 1         | 2280.233                                                 |
| Erc1           | excision repair cross-complementing rodent repair deficiency, complementation group 1 | 129.861785                                               |
| Fas            | Fas (TNF receptor superfamily member 6)                                               | 20.9477405                                               |
| FECH           | ferrochelatase                                                                        | 237.27445                                                |
| FOXP1          | forkhead box P1                                                                       | 838.7582                                                 |
| G6pdx          | glucose-6-phosphate dehydrogenase X-linked                                            | 1436.587                                                 |
| Gadd45g        | growth arrest and DNA-damage-inducible 45 gamma                                       | 287.1346                                                 |
| GMPR2          | guanosine monophosphate reductase 2                                                   | 1072.696                                                 |
| Gpr183         | G protein-coupled receptor 183                                                        | 68.417775                                                |
| Hba-a1         |                                                                                       | 7.7340334                                                |
| Hba-a1 /// Hba | hemoglobin alpha, adult chain 2; hemoglobin alpha, adult chain 1                      | 299.1725                                                 |
| Hba-x          |                                                                                       | 489.11055                                                |
| Hbb-b1 /// Hb  | hemoglobin, beta adult major chain; hemoglobin, beta adult minor chain                | 217.9607                                                 |
| HDAC5          | histone deacetylase 5                                                                 | 151.83765                                                |
| Hdac7          | histone deacetylase 7; similar to histone deacetylase 7A                              | 334.0727                                                 |
| Hells          | helicase, lymphoid specific                                                           | 563.06                                                   |
| HEPH           | hephaestin                                                                            | 1448.226                                                 |
| HIF1A          | hypoxia inducible factor 1, alpha subunit                                             | 298.94265                                                |
| HOXA9          | homeo box A9                                                                          | 113.83412                                                |
| HOXB3          | homeo box B3                                                                          | 88.79998                                                 |
| HOXB4          | homeo box B4                                                                          | 57.457115                                                |
| HS1BP3         | HCLS1 binding protein 3                                                               | 88.90962                                                 |
| ID2            | inhibitor of DNA binding 2                                                            | 1246.764                                                 |
| IL15           | interleukin 15                                                                        | 81.43784                                                 |
| Irf1           | interferon regulatory factor 1                                                        | 217.9399                                                 |
| Itpkb          | inositol 1,4,5-trisphosphate 3-kinase B                                               | 635.5867                                                 |
| Jak2           | Janus kinase 2                                                                        | 701.30475                                                |
| JMJD6          | jumonji domain containing 6                                                           | 702.8474                                                 |
| KDR            | kinase insert domain protein receptor                                                 | 3193.2875                                                |
| KIRREL3        | kin of IRRE like 3 (Drosophila)                                                       | 13.329821                                                |
| KIT            | kit oncogene                                                                          | 103.14063                                                |
| Klf1           | Kruppel-like factor 1 (erythroid)                                                     | 297.58245                                                |
| klf11          | Kruppel-like factor 11                                                                | 425.30375                                                |
| LIG4           | ligase IV, DNA, ATP-dependent                                                         | 295.59305                                                |
| LYN            | Yamaguchi sarcoma viral (v-yes-1) oncogene homolog                                    | 1583.447                                                 |
| maeA           | macrophage erythroblast attacher                                                      | 1595.668                                                 |
| MALT1          | mucosa associated lymphoid tissue lymphoma translocation gene 1                       | 160.51335                                                |
| med1           | mediator complex subunit 1                                                            | 378.9397                                                 |
| MEIS1          | Meis homeobox 1                                                                       | 585.86805                                                |
| MEN1           | multiple endocrine neoplasia 1                                                        | 30.0931                                                  |

|          |                                                                                                                                                                                                                                                                                            |            |
|----------|--------------------------------------------------------------------------------------------------------------------------------------------------------------------------------------------------------------------------------------------------------------------------------------------|------------|
| Mfsd7b   | major facilitator superfamily domain containing 7B                                                                                                                                                                                                                                         | 99.892155  |
| MINK1    | missshapen-like kinase 1 (zebrafish)                                                                                                                                                                                                                                                       | 157.36085  |
| MITF     | microphthalmia-associated transcription factor                                                                                                                                                                                                                                             | 106.94688  |
| Mll1     | myeloid/lymphoid or mixed-lineage leukemia 1                                                                                                                                                                                                                                               | 1020.2536  |
| MLL5     | myeloid/lymphoid or mixed-lineage leukemia 5                                                                                                                                                                                                                                               | 231.70175  |
| Msh2     | mutS homolog 2 (E. coli)                                                                                                                                                                                                                                                                   | 1271.379   |
| MYH9     | myosin, heavy polypeptide 9, non-muscle                                                                                                                                                                                                                                                    | 313.4124   |
| MYO1E    | myosin IE                                                                                                                                                                                                                                                                                  | 55.252045  |
| MYST3    | MYST histone acetyltransferase (monocytic leukemia) 3                                                                                                                                                                                                                                      | 945.01595  |
| ncaph2   | non-SMC condensin II complex, subunit H2                                                                                                                                                                                                                                                   | 50.109015  |
| NCOA6    | nuclear receptor coactivator 6                                                                                                                                                                                                                                                             | 415.5924   |
| NCOR1    | nuclear receptor co-repressor 1                                                                                                                                                                                                                                                            | 40.6599    |
| OSTM1    | osteopetrosis associated transmembrane protein 1                                                                                                                                                                                                                                           | 680.8857   |
| PATZ1    | POZ (BTB) and AT hook containing zinc finger 1                                                                                                                                                                                                                                             | 83.020715  |
| PBX1     | pre B-cell leukemia transcription factor 1; region containing RIKEN cDNA 2310056B04 gene; pre B-cell leukemia transcription factor 1                                                                                                                                                       | 171.50845  |
| Pgm3     | phosphoglucomutase 3                                                                                                                                                                                                                                                                       | 1067.04335 |
| PICALM   | phosphatidylinositol binding clathrin assembly protein                                                                                                                                                                                                                                     | 114.3032   |
| Pik3r1   | phosphatidylinositol 3-kinase, regulatory subunit, polypeptide 1 (p85 alpha)                                                                                                                                                                                                               | 1135.2615  |
| Pknox1   | Pbx/knotted 1 homeobox                                                                                                                                                                                                                                                                     | 1102.7363  |
| PLCG2    | phospholipase C, gamma 2                                                                                                                                                                                                                                                                   | 90.923585  |
| plscr1   | phospholipid scramblase 1; predicted gene 5530; hypothetical protein LOC677340                                                                                                                                                                                                             | 860.87215  |
| PML      | promyelocytic leukemia                                                                                                                                                                                                                                                                     | 121.957145 |
| PPP3CB   | protein phosphatase 3, catalytic subunit, beta isoform                                                                                                                                                                                                                                     | 1702.977   |
| prdx3    | peroxiredoxin 3                                                                                                                                                                                                                                                                            | 1411.9625  |
| PRKDC    | protein kinase, DNA activated, catalytic polypeptide                                                                                                                                                                                                                                       | 271.43945  |
| Psen1    | presenilin 1                                                                                                                                                                                                                                                                               | 161.1921   |
| psen2    | presenilin 2                                                                                                                                                                                                                                                                               | 300.8799   |
| PTPN22   | protein tyrosine phosphatase, non-receptor type 22 (lymphoid)                                                                                                                                                                                                                              | 2.46360565 |
| RB1      | retinoblastoma 1                                                                                                                                                                                                                                                                           | 93.746575  |
| Rbpj     | recombination signal binding protein for immunoglobulin kappa J region                                                                                                                                                                                                                     | 565.8991   |
| rogdi    | rogdi homolog (Drosophila)                                                                                                                                                                                                                                                                 | 159.13485  |
| RPA1     | replication protein A1                                                                                                                                                                                                                                                                     | 1687.092   |
| rp122    | similar to 60S ribosomal protein L22 (Heparin binding protein HBP15); ribosomal protein L22 pseudogene; predicted gene 6784; ribosomal protein                                                                                                                                             | 1010.6605  |
| rpc19    | predicted gene 4327; predicted gene 8683; similar to 40S ribosomal protein S19; predicted gene 4510; predicted gene 13143; predicted gene 9646; ribosomal protein S19; predicted gene 9091; predicted gene 6636; predicted gene 14072                                                      | 9704.6675  |
| RP56     | predicted gene 5618; predicted gene 6476; predicted gene 4796; ribosomal protein S6; predicted gene 8172; similar to 40S ribosomal protein S6; predicted gene 14138; similar to ribosomal protein S6; predicted gene 13654; predicted gene 8779; predicted gene 8925; predicted gene 11263 | 582.93645  |
| Satb1    | special AT-rich sequence binding protein 1                                                                                                                                                                                                                                                 | 545.17865  |
| SFXN1    | sideroflexin 1                                                                                                                                                                                                                                                                             | 1268.912   |
| sgpl1    | sphingosine phosphate lyase 1                                                                                                                                                                                                                                                              | 206.5466   |
| SH2B3    | similar to lymphocyte-specific adaptor protein Lnk; SH2B adaptor protein 3                                                                                                                                                                                                                 | 847.1335   |
| SLC11A2  | solute carrier family 11 (proton-coupled divalent metal ion transporters), member 2                                                                                                                                                                                                        | 72.57386   |
| slc25a38 | hypothetical protein LOC100048873; solute carrier family 25, member 38                                                                                                                                                                                                                     | 202.15225  |
| Smad5    | MAD homolog 5 (Drosophila)                                                                                                                                                                                                                                                                 | 3114.033   |
| Sod2     | superoxide dismutase 2, mitochondrial                                                                                                                                                                                                                                                      | 526.18965  |
| Sox4     | SRY-box containing gene 19; SRY-box containing gene 4                                                                                                                                                                                                                                      | 705.0027   |
| Sox6     | SRY-box containing gene 6                                                                                                                                                                                                                                                                  | 414.27685  |
| sp1      | trans-acting transcription factor 1                                                                                                                                                                                                                                                        | 4044.292   |
| SP3      | trans-acting transcription factor 3                                                                                                                                                                                                                                                        | 743.92095  |
| STAT5A   | signal transducer and activator of transcription 5A                                                                                                                                                                                                                                        | 181.9108   |
| Stat5b   | signal transducer and activator of transcription 5B                                                                                                                                                                                                                                        | 370.2271   |
| TACC3    | transforming, acidic coiled-coil containing protein 3                                                                                                                                                                                                                                      | 5316.6955  |
| tal1     | T-cell acute lymphocytic leukemia 1                                                                                                                                                                                                                                                        | 796.3158   |
| TCEA1    | transcription elongation factor A (SII) 1                                                                                                                                                                                                                                                  | 1356.9055  |
| tcf3     | transcription factor E2a                                                                                                                                                                                                                                                                   | 564.8224   |
| TGFB1    | transforming growth factor, beta 1                                                                                                                                                                                                                                                         | 695.75815  |
| TGFB2    | transforming growth factor, beta 2                                                                                                                                                                                                                                                         | 795.9007   |
| Tgfbr2   | transforming growth factor, beta receptor II                                                                                                                                                                                                                                               | 11.86643   |
| Tgfbr3   | transforming growth factor, beta receptor III                                                                                                                                                                                                                                              | 4192.1465  |
| TIMP1    | tissue inhibitor of metalloproteinase 1                                                                                                                                                                                                                                                    | 555.34125  |
| TIPARP   | TCDD-inducible poly(ADP-ribose) polymerase                                                                                                                                                                                                                                                 | 2894.7575  |
| TIRAP    | toll-interleukin 1 receptor (TIR) domain-containing adaptor protein                                                                                                                                                                                                                        | 392.2771   |
| TPD52    | similar to Tpd52 protein; tumor protein D52                                                                                                                                                                                                                                                | 7.942285   |
| TRAF6    | TNF receptor-associated factor 6                                                                                                                                                                                                                                                           | 116.289455 |
| Trp53    | transformation related protein 53                                                                                                                                                                                                                                                          | 20.87478   |
| Twsg1    | twisted gastrulation homolog 1 (Drosophila)                                                                                                                                                                                                                                                | 1324.7955  |
| VEGFA    | vascular endothelial growth factor A                                                                                                                                                                                                                                                       | 177.5533   |
| vps33a   | vacuolar protein sorting 33A (yeast)                                                                                                                                                                                                                                                       | 60.76119   |
| WWP1     | predicted gene 13416; WW domain containing E3 ubiquitin protein ligase 1                                                                                                                                                                                                                   | 1186.24    |
| Xrcc4    | hypothetical protein LOC100044170; X-ray repair complementing defective repair in Chinese hamster cells 4                                                                                                                                                                                  | 252.16095  |
| XRCC5    | X-ray repair complementing defective repair in Chinese hamster cells 5                                                                                                                                                                                                                     | 579.5788   |
| ZBTB16   | zinc finger and BTB domain containing 16                                                                                                                                                                                                                                                   | 63.120685  |
| Zfp826   | zinc finger protein 826                                                                                                                                                                                                                                                                    | 309.237    |





|              |              |                                                                                                   |             |             |
|--------------|--------------|---------------------------------------------------------------------------------------------------|-------------|-------------|
| 1420645_at   | Pcgf2        | polycomb group ring finger 2                                                                      | 2896.089696 | 2185.306251 |
| 1420675_at   | Zfp113       | zinc finger protein 113                                                                           | 438.8144853 | 348.4920397 |
| 1420731_a_at | Csrp2        | cysteine and glycine-rich protein 2                                                               | 32375.13353 | 24422.16228 |
| 1420961_a_at | lvns1abp     | influenza virus NS1A binding protein                                                              | 7692.535994 | 9681.525033 |
| 1420992_at   | Ankrd1       | ankyrin repeat domain 1 (cardiac muscle)                                                          | 373.8743889 | 420.9434655 |
| 1421047_at   | 1421047_at   | Unknown                                                                                           | 7170.059494 | 4880.91386  |
| 1421094_at   | Ztb33        | zinc finger and BTB domain containing 33                                                          | 504.7859825 | 665.9202299 |
| 1421111_at   | Rybp         | RING1 and YY1 binding protein                                                                     | 2585.029995 | 3789.825878 |
| 1421115_a_at | Zdhhc16      | zinc finger, DHHC domain containing 16                                                            | 1632.17127  | 1995.510034 |
| 1421193_a_at | Pbx3         | pre B-cell leukemia transcription factor 3                                                        | 1805.263316 | 2085.812661 |
| 1421292_a_at | Cobra1       | cofactor of BRCA1                                                                                 | 3938.452958 | 4177.775409 |
| 1421322_a_at | Irf9         | interferon regulatory factor 9                                                                    | 154.1984694 | 156.171281  |
| 1421910_at   | Tcf20        | transcription factor 20                                                                           | 12258.24568 | 14791.42846 |
| 1422102_a_at | Stat5b       | signal transducer and activator of transcription 5B                                               | 180.5974258 | 250.6197888 |
| 1422131_at   | Dcp1a        | DCP1 decapping enzyme homolog A (S. cerevisiae)                                                   | 619.7216444 | 792.3291072 |
| 1422135_at   | Zfp146       | zinc finger protein 146                                                                           | 3394.464346 | 2530.479324 |
| 1422311_a_at | Polr2a       | polymerase (RNA) II (DNA directed) polypeptide A                                                  | 16748.46698 | 14552.91411 |
| 1422398_at   | Hist1h1e     | histone cluster 1, H1e                                                                            | 30136.66792 | 39288.85189 |
| 1422487_at   | Smad4        | MAD homolog 4 (Drosophila)                                                                        | 19211.72007 | 14489.15361 |
| 1422503_s_at | Parp1        | poly (ADP-ribose) polymerase family, member 1                                                     | 2585.502722 | 3471.653038 |
| 1422517_a_at | Znrd1        | zinc ribbon domain containing, 1                                                                  | 4412.592555 | 5749.363272 |
| 1422522_at   | Fxr2         | fragile X mental retardation, autosomal homolog 2                                                 | 1694.884381 | 1587.926369 |
| 1422599_s_at | Zfp143       | zinc finger protein 143                                                                           | 854.630788  | 1108.924813 |
| 1422676_at   | Smrce1       | SWI/SNF related, matrix associated, actin dependent regulator of chromatin, subfamily e, member 1 | 15846.34392 | 10896.5003  |
| 1422680_at   | Ctr9         | cAMP responsive element binding protein 1, homolog of Drosophila E(spl)                           | 606.0000623 | 864.500703  |
| 1422692_at   | Sub1         | SUB1 homolog (S. cerevisiae)                                                                      | 597.8973353 | 440.2349542 |
| 1422731_at   | Limd1        | LIM domains containing 1                                                                          | 3011.35504  | 4489.810965 |
| 1422737_at   | Ncoa3        | nuclear receptor coactivator 3                                                                    | 231.9807817 | 330.4559977 |
| 1422742_at   | Hivep1       | human immunodeficiency virus type 1 enhancer binding protein 1                                    | 1205.254332 | 1104.811896 |
| 1422751_at   | Tle1         | transducin-like enhancer of split 1, homolog of Drosophila E(spl)                                 | 704.5279842 | 1002.618663 |
| 1422778_at   | Taf9         | TAF9 RNA polymerase II, TATA box binding protein (TBP)-associated factor                          | 6588.448808 | 9192.880633 |
| 1422946_a_at | Dnmt1        | DNA methyltransferase (cytosine-5) 1                                                              | 7054.494517 | 7639.907307 |
| 1423060_at   | Pa2g4        | proliferation-associated 2G4                                                                      | 43766.29853 | 63154.83671 |
| 1423069_at   | Adnp         | activity-dependent neuroprotective protein                                                        | 24185.24273 | 23292.24229 |
| 1423105_a_at | Yeats4       | YEATS domain containing 4                                                                         | 17679.03505 | 18472.8079  |
| 1423128_at   | Aip          | aryl-hydrocarbon receptor-interacting protein                                                     | 4477.122553 | 3780.610928 |
| 1423165_a_at | Mta2         | metastasis-associated gene family, member 2                                                       | 1760.35272  | 1876.806595 |
| 1423241_a_at | Tfdp1        | transcription factor Dp 1                                                                         | 40422.03854 | 50088.10563 |
| 1423324_at   | Pnn          | pinin                                                                                             | 29419.18508 | 32525.6915  |
| 1423374_at   | Ncoa6        | nuclear receptor coactivator 6                                                                    | 638.1945023 | 491.320403  |
| 1423398_at   | Taf12        | TAF12 RNA polymerase II, TATA box binding protein (TBP)-associated factor                         | 5898.703059 | 6071.814927 |
| 1423402_at   | Creb1        | cAMP responsive element binding protein 1                                                         | 10304.74636 | 14383.67659 |
| 1423421_at   | Ankrd49      | ankyrin repeat domain 49                                                                          | 2529.966831 | 2200.575381 |
| 1423501_at   | 1423501_at   | Unknown                                                                                           | 3439.131144 | 2971.492013 |
| 1423507_a_at | Sirt2        | sirtuin 2 (silent mating type information regulation 2, homolog) 2 (S. cerevisiae)                | 2290.438057 | 2088.539668 |
| 1423616_at   | Tarbp2       | TAR (HIV) RNA binding protein 2                                                                   | 464.1641619 | 625.9335786 |
| 1423645_a_at | Ddx5         | DEAD (Asp-Glu-Ala-Asp) box polypeptide 5                                                          | 191103.2888 | 142208.6479 |
| 1423702_at   | H1f0         | H1 histone family, member 0                                                                       | 26400.63933 | 20756.64234 |
| 1423733_a_at | Fiz1         | Flt3 interacting zinc finger protein 1                                                            | 1676.631541 | 2030.260252 |
| 1423750_a_at | Sf1          | splicing factor 1                                                                                 | 43793.42854 | 50260.41905 |
| 1423796_at   | Sfpq         | splicing factor proline/glutamine rich (polypyrimidine tract binding protein associated)          | 11804.35042 | 9264.485157 |
| 1423955_a_at | Lass2        | LAG1 homolog, ceramide synthase 2                                                                 | 4359.49151  | 3600.159356 |
| 1423997_at   | Csde1        | cold shock domain containing E1, RNA binding                                                      | 20347.34344 | 16722.40603 |
| 1423998_at   | Gtf3c5       | general transcription factor IIIC, polypeptide 5                                                  | 861.7919065 | 1015.464121 |
| 1424001_at   | Mki67p       | Mki67 (FHA domain) interacting nucleolar phosphoprotein                                           | 5100.52854  | 7658.114019 |
| 1424055_at   | Ncoa5        | nuclear receptor coactivator 5                                                                    | 1351.108667 | 1407.571576 |
| 1424170_at   | Phf5a        | PHD finger protein 5A                                                                             | 43343.34829 | 48883.26738 |
| 1424216_a_at | Papola       | poly (A) polymerase alpha                                                                         | 7035.245702 | 9656.158237 |
| 1424227_at   | Polr3h       | polymerase (RNA) III (DNA directed) polypeptide H                                                 | 1028.966998 | 1399.999513 |
| 1424238_at   | Sirt7        | sirtuin 7 (silent mating type information regulation 2, homolog) 7 (S. cerevisiae)                | 234.4732696 | 309.6373057 |
| 1424255_at   | Supt5h       | suppressor of Ty 5 homolog (S. cerevisiae)                                                        | 13021.01848 | 13137.86959 |
| 1424258_at   | Polr2d       | polymerase (RNA) II (DNA directed) polypeptide D                                                  | 3204.242196 | 3788.84436  |
| 1424264_at   | Med6         | mediator of RNA polymerase II transcription, subunit 6 homolog (yeast)                            | 3441.90973  | 2582.751718 |
| 1424297_at   | Zfp282       | zinc finger protein 282                                                                           | 259.411498  | 328.2209799 |
| 1424355_a_at | Sin3b        | transcriptional regulator, SIN3B (yeast)                                                          | 4708.45223  | 6148.696137 |
| 1424473_at   | Polr2h       | polymerase (RNA) II (DNA directed) polypeptide H                                                  | 23104.80744 | 30688.74898 |
| 1424566_s_at | Polr3d       | polymerase (RNA) III (DNA directed) polypeptide D                                                 | 758.7613456 | 869.0310173 |
| 1424593_at   | Ecd          | ecdysoneless homolog (Drosophila)                                                                 | 545.315014  | 476.1547407 |
| 1424750_at   | Ztb1         | zinc finger and BTB domain containing 1                                                           | 11453.81008 | 9384.088622 |
| 1424751_at   | Abt1         | activator of basal transcription 1                                                                | 480.9862693 | 619.5658897 |
| 1424916_x_at | Zfp764       | zinc finger protein 764                                                                           | 1793.990131 | 1429.999999 |
| 1425287_at   | Zfp189       | zinc finger protein 189                                                                           | 214.2114984 | 188.3790191 |
| 1425350_a_at | Myef2        | myelin basic protein expression factor 2, repressor                                               | 25717.58209 | 21053.83301 |
| 1425360_at   | Mllt6        | myeloid/lymphoid or mixed-lineage leukemia (trithorax homolog, Drosophila); translocated to, 6    | 160.0319385 | 202.8664965 |
| 1425422_a_at | Parn         | poly(A)-specific ribonuclease (deadenylation nuclease)                                            | 539.2969483 | 575.6210821 |
| 1425473_at   | Med17        | mediator complex subunit 17                                                                       | 2070.087432 | 2466.082703 |
| 1425481_at   | Cnot6l       | CCR4-NOT transcription complex, subunit 6-like                                                    | 15530.49537 | 22528.94691 |
| 1425585_at   | Med12        | mediator of RNA polymerase II transcription, subunit 12 homolog (yeast)                           | 3348.119602 | 2778.202284 |
| 1425599_a_at | Gatad1       | GATA zinc finger domain containing 1                                                              | 16059.53788 | 11310.79365 |
| 1425806_a_at | Med21        | mediator complex subunit 21                                                                       | 5445.02426  | 4877.049719 |
| 1425837_a_at | 1425837_a_at | Unknown                                                                                           | 1055.913041 | 1368.663224 |
| 1425895_a_at | Id1          | inhibitor of DNA binding 1                                                                        | 2133.924829 | 2318.78899  |
| 1425927_a_at | Atf5         | activating transcription factor 5                                                                 | 700.9296909 | 526.5068704 |
| 1425940_a_at | Ssbp3        | single-stranded DNA binding protein 3                                                             | 2824.377349 | 1895.678911 |
| 1426051_a_at | Cenpb        | centromere protein B                                                                              | 1089.091767 | 1196.396042 |
| 1426187_a_at | Hax1         | HCLS1 associated X-1                                                                              | 17333.91623 | 18984.27219 |
| 1426237_at   | Sp2          | Sp2 transcription factor                                                                          | 1051.751541 | 1068.885127 |
| 1426415_a_at | Trim25       | tripartite motif-containing 25                                                                    | 1373.617138 | 1818.7976   |
| 1426437_s_at | Hdac3        | histone deacetylase 3                                                                             | 1388.043634 | 1974.191879 |
| 1426470_at   | Tbp          | TATA box binding protein                                                                          | 176.2731641 | 153.5543622 |
| 1426527_at   | Toe1         | target of EGR1, member 1 (nuclear)                                                                | 1743.16997  | 2200.588666 |
| 1426564_at   | Zfp553       | zinc finger protein 553                                                                           | 9101.686131 | 7391.765039 |
| 1426587_a_at | Stat3        | signal transducer and activator of transcription 3                                                | 1858.265623 | 2714.539228 |
| 1426625_at   | Zfp623       | zinc finger protein 623                                                                           | 1170.925921 | 1396.687771 |

|              |            |                                                                                                   |             |             |
|--------------|------------|---------------------------------------------------------------------------------------------------|-------------|-------------|
| 1426626_at   | Gtf2f      | general transcription factor IIF, polypeptide 2                                                   | 4731.163151 | 4864.814297 |
| 1426719_at   | Apbb2      | amyloid beta (A4) precursor protein-binding, family B, member 2                                   | 4797.50831  | 6437.052288 |
| 1426769_s_at | Maml1      | mastermind like 1 (Drosophila)                                                                    | 4559.569817 | 5187.674216 |
| 1426789_s_at | Ssrp1      | structure specific recognition protein 1                                                          | 31371.06864 | 33711.84472 |
| 1426805_at   | Smarca4    | SWI/SNF related, matrix associated, actin dependent regulator of chromatin, subfamily a, member 4 | 16097.54337 | 12487.09815 |
| 1426829_at   | Uimc1      | ubiquitin interaction motif containing 1                                                          | 2658.582074 | 3240.865382 |
| 1426878_at   | Pbrm1      | polybromo 1                                                                                       | 2221.775168 | 1681.692042 |
| 1426979_at   | Mixip      | MLX interacting protein                                                                           | 999.5934405 | 1100.943588 |
| 1427027_a_at | Gtf3a      | general transcription factor III A                                                                | 2771.397372 | 3130.8337   |
| 1427099_at   | Maz        | MYC-associated zinc finger protein (purine-binding transcription factor)                          | 6763.820796 | 7737.905062 |
| 1427120_at   | Zfp26      | zinc finger protein 26                                                                            | 2729.639961 | 2167.206454 |
| 1427156_s_at | Ascc2      | activating signal cointegrator 1 complex subunit 2                                                | 2712.926989 | 1942.488925 |
| 1427194_a_at | Ercoc8     | excision repaircross-complementing rodent repair deficiency, complementation group 8              | 717.789284  | 1075.62438  |
| 1427241_at   | Papolg     | poly(A) polymerase gamma                                                                          | 501.9198519 | 684.5838234 |
| 1427248_at   | Whsc2      | Wolf-Hirschhorn syndrome candidate 2 (human)                                                      | 1583.589379 | 2270.122105 |
| 1427283_at   | Mll1       | myeloid/lymphoid or mixed-lineage leukemia 1                                                      | 3797.377767 | 2723.897414 |
| 1427460_at   | 1427460_at | Unknown                                                                                           | 1154.018228 | 1534.583668 |
| 1427555_at   | Mll2       | myeloid/lymphoid or mixed-lineage leukemia                                                        | 963.0173937 | 1215.984239 |
| 1427702_at   | Zfp1       | zinc finger protein 1                                                                             | 448.9069513 | 527.3985609 |
| 1427705_a_at | Nfkb1      | nuclear factor of kappa light polypeptide gene enhancer in B-cells 1, p105                        | 736.5957556 | 1015.674657 |
| 1427762_x_at | Hist1h2bp  | histone cluster 1, H2bp                                                                           | 25537.46238 | 25990.44302 |
| 1427808_at   | Nfya       | nuclear transcription factor-Y alpha                                                              | 989.1154403 | 1347.862385 |
| 1427898_at   | Rnf6       | ring finger protein (C3H2C3 type) 6                                                               | 3940.835106 | 3513.58546  |
| 1427940_s_at | Mycbp      | c-myc binding protein                                                                             | 817.9919404 | 1078.304017 |
| 1428092_at   | Cdc5l      | cell division cycle 5-like (S. pombe)                                                             | 8196.094149 | 8752.744128 |
| 1428170_at   | Zfp180     | zinc finger protein 180                                                                           | 742.8509264 | 727.0934566 |
| 1428249_at   | Pygo2      | pygopus 2                                                                                         | 2291.062196 | 1664.330041 |
| 1428263_a_at | Tceb2      | transcription elongation factor B (SIII), polypeptide 2                                           | 19595.19119 | 28350.74407 |
| 1428348_at   | Gz1f       | GDNF-inducible zinc finger protein 1                                                              | 273.3296457 | 245.2816904 |
| 1428382_at   | Smarcc2    | SWI/SNF related, matrix associated, actin dependent regulator of chromatin, subfamily c, member 2 | 5518.255716 | 6166.977602 |
| 1428494_a_at | Polr2i     | polymerase (RNA) II (DNA directed) polypeptide                                                    | 10484.19291 | 12088.58182 |
| 1428508_at   | Tbc1d2b    | TBC1 domain family, member 2B                                                                     | 925.2599791 | 970.6602703 |
| 1428522_at   | Tif2       | transcription termination factor, RNA polymerase II                                               | 2386.548697 | 2968.932235 |
| 1428576_at   | Hif1an     | hypoxia-inducible factor 1, alpha subunit inhibitor                                               | 3005.846785 | 2044.864697 |
| 1428704_at   | Zfp661     | zinc finger protein 661                                                                           | 1070.724395 | 813.2966416 |
| 1428760_at   | Snapc3     | small nuclear RNA activating complex, polypeptide                                                 | 3681.321241 | 4088.759826 |
| 1428773_s_at | Bcor       | BCL6 interacting corepressor                                                                      | 1115.739224 | 1546.964892 |
| 1428830_at   | Atm        | ataxia telangiectasia mutated homolog (human)                                                     | 4209.677683 | 3469.671742 |
| 1428997_at   | Phf23      | PHD finger protein 23                                                                             | 4451.661434 | 6190.505992 |
| 1428999_at   | Phf3       | PHD finger protein 3                                                                              | 7255.16993  | 9481.673162 |
| 1429046_at   | Smurf2     | SMAD specific E3 ubiquitin protein ligase 2                                                       | 30904.54147 | 28032.55289 |
| 1429064_at   | Dip2c      | DIP2 disco-interacting protein 2 homolog C (Drosophila)                                           | 930.4238404 | 633.6788476 |
| 1429125_at   | Zbtb9      | zinc finger and BTB domain containing 9                                                           | 1665.203278 | 1252.930963 |
| 1429170_a_at | Mtf1       | metal response element binding transcription factor 1                                             | 858.7436873 | 1236.124855 |
| 1429294_at   | Tripl3     | thyroid hormone receptor interactor 13                                                            | 12874.6698  | 19018.55741 |
| 1429335_at   | Snapc1     | small nuclear RNA activating complex, polypeptide 1                                               | 732.8681671 | 904.9763463 |
| 1429557_at   | Mcm8       | minichromosome maintenance deficient 8 (S. cerevisiae)                                            | 1668.87284  | 1903.810696 |
| 1429903_at   | Dpf2       | D4, zinc and double PHD fingers family 2                                                          | 290.329851  | 199.9796623 |
| 1430047_at   | Ankrd32    | ankyrin repeat domain 32                                                                          | 3042.443194 | 3459.451397 |
| 1430458_at   | Supt6h     | suppressor of Ty 6 homolog (S. cerevisiae)                                                        | 320.6863266 | 379.6304611 |
| 1430533_a_at | Cttnb1     | catenin (cadherin associated protein), beta 1                                                     | 8698.759435 | 11445.7333  |
| 1431127_at   | Zbtb43     | zinc finger and BTB domain containing 43                                                          | 691.3344535 | 872.8654051 |
| 1431345_a_at | Taf1b      | TATA box binding protein (Tbp)-associated factor, RNA polymerase I, B                             | 949.6492518 | 1054.081849 |
| 1431676_x_at | Gtf2i      | general transcription factor II I                                                                 | 3960.000455 | 3486.241405 |
| 1431804_a_at | Sp3        | trans-acting transcription factor 3                                                               | 2037.394798 | 2104.866714 |
| 1431999_at   | Polr3f     | polymerase (RNA) III (DNA directed) polypeptide F                                                 | 193.2496659 | 172.6223803 |
| 1432057_a_at | Prdm5      | PR domain containing 5                                                                            | 2248.145446 | 3414.582632 |
| 1432462_a_at | Med27      | mediator complex subunit 27                                                                       | 1559.231843 | 2017.93547  |
| 1432495_at   | Sox7       | SRY-box containing gene 7                                                                         | 527.7389711 | 370.8935581 |
| 1433528_at   | Gtf2a2     | general transcription factor II A, 2                                                              | 6269.15561  | 4901.686876 |
| 1433552_a_at | Polr2b     | polymerase (RNA) II (DNA directed) polypeptide B                                                  | 10752.98401 | 10935.59628 |
| 1433555_at   | Eaf1       | ELL associated factor 1                                                                           | 5917.060095 | 4495.410481 |
| 1433679_at   | Fubp3      | far upstream element (FUSE) binding protein 3                                                     | 23501.67046 | 22513.56622 |
| 1433733_a_at | Cry1       | cryptochrome 1 (photolyase-like)                                                                  | 1453.852569 | 2153.344193 |
| 1433736_at   | Hcfc1      | host cell factor C1                                                                               | 3267.77685  | 4512.046341 |
| 1433780_at   | Ubn1       | ubiquitin 1                                                                                       | 2019.196535 | 2513.057226 |
| 1433919_at   | Asb4       | ankyrin repeat and SOCS box-containing 4                                                          | 8380.605858 | 6977.469395 |
| 1433981_s_at | Kat5       | K(lysine) acetyltransferase 5                                                                     | 1238.377733 | 1124.468902 |
| 1434009_at   | Grif1      | glucocorticoid receptor DNA binding factor 1                                                      | 1452.431003 | 1451.465851 |
| 1434037_s_at | Kat2b      | K(lysine) acetyltransferase 2B                                                                    | 449.922248  | 320.4884819 |
| 1434079_s_at | Mcm2       | minichromosome maintenance deficient 2 mitotin (S. cerevisiae)                                    | 8221.355708 | 9691.265759 |
| 1434088_at   | Zkscan17   | zinc finger with KRAB and SCAN domains 1                                                          | 1224.007143 | 1105.205899 |
| 1434114_at   | Rexo4      | REX4, RNA exonuclease 4 homolog (S. cerevisiae)                                                   | 1876.735717 | 1596.911868 |
| 1434318_a_at | Tcf3       | transcription factor E3                                                                           | 1514.573306 | 1566.933527 |
| 1434514_at   | Rbm15      | RNA binding motif protein 15                                                                      | 1031.841001 | 992.6442174 |
| 1434564_at   | E2f3       | E2F transcription factor 3                                                                        | 13815.49607 | 9826.839548 |
| 1434627_at   | Nrf1       | nuclear respiratory factor 1                                                                      | 1541.623216 | 2001.59564  |
| 1434753_at   | Nfrkb      | nuclear factor related to kappa B binding protein                                                 | 771.6738286 | 1062.054219 |
| 1434907_at   | Tbp1l      | TATA box binding protein-like 1                                                                   | 847.6631484 | 814.1737586 |
| 1434963_at   | Supt3h     | suppressor of Ty 3 homolog (S. cerevisiae)                                                        | 1326.995186 | 923.5098334 |
| 1435224_at   | Crebbp     | CREB binding protein                                                                              | 32346.71719 | 24276.56187 |
| 1435249_at   | Btaf1      | BTAf1 RNA polymerase II, B-TFIID transcription factor-associated, (Mot1 homolog, S. cerevisiae)   | 1693.425829 | 1557.586626 |
| 1435362_at   | Foxj3      | forkhead box J3                                                                                   | 13255.64004 | 9710.890693 |
| 1435471_at   | Zfp708     | zinc finger protein 708                                                                           | 132.6131746 | 111.0018042 |
| 1435474_at   | Taf5       | TAF5 RNA polymerase II, TATA box binding protein (TBP)-associated facto                           | 4808.772018 | 6500.587366 |
| 1435575_at   | Kntc1      | kinetochore associated 1                                                                          | 1080.142426 | 1581.701337 |
| 1435592_at   | Eif5b      | eukaryotic translation initiation factor 5B                                                       | 646.7587419 | 791.858633  |
| 1435824_at   | Yy1        | YY1 transcription factor                                                                          | 1728.1448   | 2276.61531  |
| 1435965_at   | Cnot3      | CCR4-NOT transcription complex, subunit 3                                                         | 4521.790771 | 4073.30553  |
| 1436023_at   | Bclaf1     | BCL2-associated transcription factor 1                                                            | 15640.02922 | 12585.05315 |
| 1436049_at   | Tox4       | TOX high mobility group box family member                                                         | 1363.193754 | 1180.697746 |
| 1436068_at   | Zbtb10     | zinc finger and BTB domain containing 10                                                          | 15435.58877 | 16407.57544 |
| 1436085_at   | Zbtb34     | zinc finger and BTB domain containing 34                                                          | 2333.343218 | 1828.341383 |
| 1436226_at   | Tceb1      | transcription elongation factor B (SIII), polypeptide 1                                           | 7714.446509 | 5609.676437 |

|              |              |                                                                                                   |             |             |
|--------------|--------------|---------------------------------------------------------------------------------------------------|-------------|-------------|
| 1436284_s_at | Zfp319       | zinc finger protein 319                                                                           | 167.0340657 | 232.0520694 |
| 1436343_at   | Chd4         | chromodomain helicase DNA binding protein                                                         | 9239.146955 | 6780.436809 |
| 1436434_at   | E2f2         | E2F transcription factor 2                                                                        | 1105.341768 | 861.2353925 |
| 1436790_a_at | Sox11        | SRY-box containing gene 11                                                                        | 6525.481724 | 5438.41775  |
| 1436802_at   | Ilf3         | interleukin enhancer binding factor 3                                                             | 5681.49432  | 7245.394498 |
| 1436985_at   | Zfp644       | zinc finger protein 644                                                                           | 9514.703818 | 6699.507571 |
| 1437023_at   | Zfp12        | zinc finger protein 12                                                                            | 555.2364576 | 470.1382674 |
| 1437039_at   | Cops2        | COP9 (constitutive photomorphogenic) homolog, subunit 2 (Arabidopsis thaliana)                    | 6043.64738  | 5010.87384  |
| 1437241_at   | Klf11        | Kruppel-like factor 11                                                                            | 1045.661331 | 954.9751595 |
| 1437281_x_at | Xab2         | XPA binding protein 2                                                                             | 5815.466886 | 5147.631319 |
| 1437375_at   | Rfx3         | regulatory factor X, 3 (influences HLA class II expression)                                       | 2836.537053 | 2300.503759 |
| 1437414_at   | Zfp217       | zinc finger protein 217                                                                           | 17380.86672 | 19648.34284 |
| 1437483_at   | Zfp513       | zinc finger protein 513                                                                           | 340.3746055 | 403.0773448 |
| 1437484_at   | Zbtb5        | zinc finger and BTB domain containing 5                                                           | 215.5319761 | 325.233902  |
| 1437487_at   | Myst3        | MYST histone acetyltransferase (monocytic leukemia) 3                                             | 3197.744949 | 3979.597324 |
| 1437508_at   | Sp4          | trans-acting transcription factor 4                                                               | 1036.944973 | 726.6013638 |
| 1437543_at   | Fubp1        | far upstream element (FUSE) binding protein 1                                                     | 1513.974185 | 1132.316832 |
| 1437571_at   | Hic2         | hypermethylated in cancer 2                                                                       | 653.1452275 | 856.8488504 |
| 1437585_x_at | Zfp161       | zinc finger protein 161                                                                           | 11204.05226 | 13438.21462 |
| 1437623_x_at | Xrcc3        | X-ray repair complementing defective repair in Chinese hamster cells 3                            | 952.7838037 | 1222.395825 |
| 1437745_at   | Chd7         | chromodomain helicase DNA binding protein 7                                                       | 5774.086314 | 6963.870499 |
| 1437850_a_at | Cnbp         | cellular nucleic acid binding protein                                                             | 137904.3997 | 136349.549  |
| 1437919_at   | Bdp1         | B double prime 1, subunit of RNA polymerase III transcription initiation factor IIIB              | 1046.044408 | 1121.57723  |
| 1438047_at   | Zfp384       | zinc finger protein 384                                                                           | 3353.129631 | 3686.289835 |
| 1438219_at   | Pura         | purine rich element binding protein A                                                             | 628.7008148 | 440.7671191 |
| 1438307_at   | Hmgb2        | high mobility group box 2                                                                         | 237.883813  | 165.3459322 |
| 1438416_at   | Med16        | mediator complex subunit 16                                                                       | 364.377755  | 374.1319637 |
| 1438487_s_at | Zzz3         | zinc finger, ZZ domain containing 3                                                               | 689.6435231 | 794.9205948 |
| 1438692_at   | Gtf3c4       | general transcription factor IIIC, polypeptide 4                                                  | 2095.607523 | 2481.668026 |
| 1438807_at   | Hnmpr        | heterogeneous nuclear ribonucleoprotein R                                                         | 1177.669695 | 893.4507684 |
| 1438847_at   | Mxd3         | Max dimerization protein 3                                                                        | 2488.756378 | 1975.490051 |
| 1438852_x_at | Mcm6         | minichromosome maintenance deficient 6 (MIS5 homolog, <i>S. pombe</i> ) ( <i>S. cerevisiae</i> )  | 94554.16675 | 81531.86895 |
| 1438912_at   | Hdgrp2       | hepatoma-derived growth factor, related protein 2                                                 | 124.7776234 | 163.2513446 |
| 1438938_x_at | Phb2         | prohibitin 2                                                                                      | 24514.63991 | 35737.51069 |
| 1438992_x_at | Atf4         | activating transcription factor 4                                                                 | 27912.46611 | 29281.25544 |
| 1439020_at   | AW146020     | expressed sequence AW146020                                                                       | 3167.492441 | 3895.022083 |
| 1439296_at   | Prickle3     | prickle homolog 3 ( <i>Drosophila</i> )                                                           | 13257.40063 | 12647.59807 |
| 1440972_at   | Nsd1         | nuclear receptor-binding SET-domain protein 1                                                     | 5473.72874  | 3860.129376 |
| 1441973_at   | Zfp295       | zinc finger protein 295                                                                           | 258.2762281 | 204.109717  |
| 1442274_at   | Zdhhc15      | zinc finger, DHHC domain containing 15                                                            | 2301.088925 | 1588.754924 |
| 1442514_a_at | Eli3         | elongation factor RNA polymerase II-like 3                                                        | 689.3712796 | 687.7383798 |
| 1442623_at   | Mef2a        | myocyte enhancer factor 2A                                                                        | 2049.495611 | 1458.618879 |
| 1443020_at   | Hmbox1       | homeobox containing 1                                                                             | 653.0699753 | 531.2079371 |
| 1443897_at   | Ddit3        | DNA-damage inducible transcript 3                                                                 | 422.9469691 | 352.793718  |
| 1445684_s_at | Hdac2        | histone deacetylase 2                                                                             | 51370.01852 | 41212.89645 |
| 1445886_at   | Elk3         | ELK3, member of ETS oncogene family                                                               | 6371.770164 | 9469.510452 |
| 1446127_at   | Zeb1         | zinc finger E-box binding homeobox 1                                                              | 2361.179001 | 2595.781091 |
| 1446337_at   | Htt          | huntingtin                                                                                        | 187.5431086 | 156.750106  |
| 1447417_at   | Taf1         | TAF1 RNA polymerase II, TATA box binding protein (TBP)-associated facto                           | 2262.927416 | 2724.226239 |
| 1447432_s_at | Zfp263       | zinc finger protein 263                                                                           | 5409.325123 | 4642.67602  |
| 1448103_s_at | Nono         | non-POU-domain-containing, octamer binding protein                                                | 126068.6615 | 94857.13555 |
| 1448195_at   | Taf5l        | TAF5-like RNA polymerase II, p300/CBP-associated factor (PCAF)-associated factor                  | 2994.751435 | 3325.180194 |
| 1448246_at   | Hdac1        | histone deacetylase 1                                                                             | 23099.17366 | 23576.74072 |
| 1448266_at   | Edf1         | endothelial differentiation-related factor 1                                                      | 4428.887854 | 5462.0944   |
| 1448282_at   | Plrg1        | pleiotropic regulator 1, PRL1 homolog ( <i>Arabidopsis</i> )                                      | 9159.548903 | 9984.569117 |
| 1448401_at   | Smardc2      | SWI/SNF related, matrix associated, actin dependent regulator of chromatin, subfamily d, member 2 | 1590.58484  | 1329.506231 |
| 1448446_at   | Deaf1        | deformed epidermal autoregulatory factor 1 ( <i>Drosophila</i> )                                  | 2437.257318 | 2229.071704 |
| 1448476_at   | Nap114       | nucleosome assembly protein 1-like 4                                                              | 52571.95962 | 62822.42432 |
| 1448497_at   | Ercc3        | excision repair cross-complementing rodent repair deficiency, complementation group 3             | 1563.75027  | 1562.39311  |
| 1448519_at   | Tead2        | TEA domain family member                                                                          | 22295.94098 | 17736.75445 |
| 1448653_at   | Eed          | embryonic ectoderm development                                                                    | 9285.419856 | 13394.96047 |
| 1448694_at   | Jun          | Jun oncogene                                                                                      | 25719.32803 | 20709.74545 |
| 1448705_at   | Zbtb22       | zinc finger and BTB domain containing 22                                                          | 1100.007246 | 927.0540017 |
| 1448707_at   | Taf13        | TAF13 RNA polymerase II, TATA box binding protein (TBP)-associated facto                          | 11606.93729 | 8950.314135 |
| 1448726_at   | Snapc2       | small nuclear RNA activating complex, polypeptide                                                 | 183.3778963 | 170.7661135 |
| 1448758_at   | Nrnf2        | nuclear receptor binding factor 2                                                                 | 1200.658674 | 1055.045696 |
| 1448794_s_at | Dnajc2       | DnaJ (Hsp40) homolog, subfamily C, member                                                         | 3239.52523  | 4620.667431 |
| 1448808_a_at | Nme2         | non-metastatic cells 2, protein (NM23B) expressed in                                              | 272037.4869 | 262459.3085 |
| 1448834_at   | Foxm1        | forkhead box M1                                                                                   | 967.0728366 | 1405.927022 |
| 1448835_at   | E2f6         | E2F transcription factor 6                                                                        | 8957.362342 | 10914.11382 |
| 1448838_at   | Topors       | topoisomerase I binding, arginine/serine-rich                                                     | 10560.76662 | 12164.66933 |
| 1448884_at   | Gtf2e2       | general transcription factor II E, polypeptide 2 (beta subunit)                                   | 7951.797966 | 9090.220884 |
| 1448886_at   | Gata3        | GATA binding protein 3                                                                            | 582.0340612 | 566.8125964 |
| 1448890_at   | Klf2         | Kruppel-like factor 2 (lung)                                                                      | 2958.010112 | 2179.925821 |
| 1448893_at   | Ncor2        | nuclear receptor co-repressor 2                                                                   | 361.2116913 | 435.4295188 |
| 1448916_at   | Mafg         | v-maf musculoaponeurotic fibrosarcoma oncogene family, protein G (avian)                          | 1112.01846  | 1449.135724 |
| 1448917_at   | Med30        | mediator complex subunit 30                                                                       | 2059.219904 | 1796.385485 |
| 1448963_at   | Nfyc         | nuclear transcription factor-Y gamma                                                              | 2230.966139 | 2071.491142 |
| 1449041_a_at | Trip6        | thyroid hormone receptor interactor 6                                                             | 14355.07264 | 16588.11672 |
| 1449085_at   | Phf10        | PHD finger protein 10                                                                             | 9904.348998 | 10590.70859 |
| 1449086_at   | Rnf141       | ring finger protein 141                                                                           | 5090.204955 | 3807.12201  |
| 1449126_at   | Zfp90        | zinc finger protein 90                                                                            | 1397.467353 | 1205.191771 |
| 1449148_a_at | Phf1         | putative homeodomain transcription factor 1                                                       | 1746.923365 | 2248.768899 |
| 1449311_at   | Bach1        | BTB and CNC homology 1                                                                            | 230.9893627 | 337.0248125 |
| 1449363_at   | Atf3         | activating transcription factor 3                                                                 | 6091.813325 | 7624.377255 |
| 1449389_at   | Tal1         | T-cell acute lymphocytic leukemia 1                                                               | 2406.215735 | 2733.22933  |
| 1449480_at   | Sap18        | Sin3-associated polypeptide 18                                                                    | 1040.028907 | 1346.102581 |
| 1449578_at   | Supt16h      | suppressor of Ty 16 homolog ( <i>S. cerevisiae</i> )                                              | 36998.67501 | 44114.75385 |
| 1449643_s_at | 1449643_s_at | Unknown                                                                                           | 52191.18589 | 64103.86055 |
| 1449815_a_at | Ssbp2        | single-stranded DNA binding protein                                                               | 1609.465482 | 2292.644134 |
| 1449915_at   | Zfp202       | zinc finger protein 202                                                                           | 165.2333209 | 137.5550497 |
| 1449951_at   | Nfkb11       | nuclear factor of kappa light polypeptide gene enhancer in B-cells inhibitor-like 1               | 1307.217722 | 1159.116934 |
| 1450100_a_at | Tcerg1       | transcription elongation regulator 1 (CA150)                                                      | 12039.36734 | 13444.22038 |
| 1450191_a_at | Sox13        | SRY-box containing gene 13                                                                        | 723.5964324 | 723.8827722 |

|              |            |                                                                                                               |             |             |
|--------------|------------|---------------------------------------------------------------------------------------------------------------|-------------|-------------|
| 1450333_a_at | Gata2      | GATA binding protein 2                                                                                        | 3736.636    | 3185.810028 |
| 1450464_at   | E4f1       | E4F transcription factor 1                                                                                    | 917.2679571 | 1352.421479 |
| 1450664_at   | Gabpa      | GA repeat binding protein, alpha                                                                              | 3393.657291 | 2744.172471 |
| 1450701_a_at | Gtf2h2     | general transcription factor II H, polypeptide 2                                                              | 2403.493691 | 2850.615631 |
| 1450705_at   | Rdbp       | RD RNA-binding protein                                                                                        | 6399.088597 | 6496.507837 |
| 1450723_at   | Isl1       | ISL1 transcription factor, LIM/homeodomain                                                                    | 1002.225696 | 1234.888858 |
| 1450817_at   | Solh       | small optic lobes homolog (Drosophila)                                                                        | 683.0442196 | 920.1109389 |
| 1450929_at   | Zfp57      | zinc finger protein 57                                                                                        | 4032.036374 | 3551.090269 |
| 1451012_a_at | Csda       | cold shock domain protein A                                                                                   | 61172.92984 | 87873.14126 |
| 1451072_a_at | Rnf4       | ring finger protein 4                                                                                         | 15668.83413 | 14172.20071 |
| 1451102_at   | Cnot8      | CCR4-NOT transcription complex, subunit 8                                                                     | 1640.556236 | 1231.728335 |
| 1451135_at   | Gtf2b      | general transcription factor IIB                                                                              | 5818.975052 | 5165.451974 |
| 1451237_s_at | Rbm7       | RNA binding motif protein 7                                                                                   | 5092.948032 | 6639.10874  |
| 1451244_a_at | Zfp422     | zinc finger protein 422                                                                                       | 18353.1954  | 20410.37455 |
| 1451252_at   | Irf2bp1    | interferon regulatory factor 2 binding protein 1                                                              | 438.9419884 | 446.8865783 |
| 1451323_at   | Zfp7       | zinc finger protein 7                                                                                         | 457.9209153 | 337.7862858 |
| 1451658_a_at | Polr3c     | polymerase (RNA) III (DNA directed) polypeptide C                                                             | 979.9549501 | 1353.65385  |
| 1451676_at   | Drp1       | Dr1 associated protein 1 (negative cofactor 2 alpha)                                                          | 3914.801412 | 4597.920509 |
| 1451920_a_at | Rfc1       | replication factor C (activator 1) 1                                                                          | 12106.96845 | 14250.01373 |
| 1451968_at   | Xrcc5      | X-ray repair complementing defective repair in Chinese hamster cells 5                                        | 1572.372052 | 1525.012841 |
| 1451984_at   | Hnrnpul1   | heterogeneous nuclear ribonucleoprotein U-like 1                                                              | 12072.94335 | 10848.10303 |
| 1451995_at   | Taf11      | TAF11 RNA polymerase II, TATA box binding protein (TBP)-associated factor                                     | 2963.120791 | 2722.074537 |
| 1452024_a_at | Ldb1       | LIM domain binding 1 zinc                                                                                     | 9791.66762  | 11270.36813 |
| 1452045_at   | Zfp281     | finger protein 281 mediator                                                                                   | 2153.074988 | 2927.215332 |
| 1452064_at   | Med23      | complex subunit 23                                                                                            | 791.047912  | 1015.492441 |
| 1452125_at   | Thrap3     | thyroid hormone receptor associated protein 3                                                                 | 11998.31154 | 13287.45186 |
| 1452179_at   | Phf17      | PHD finger protein 17                                                                                         | 605.984925  | 512.0079654 |
| 1452208_at   | Prdm4      | PR domain containing 4                                                                                        | 4171.763513 | 3974.360499 |
| 1452221_a_at | Cxxc1      | CXXC finger 1 (PHD domain)                                                                                    | 2241.002633 | 3178.757784 |
| 1452276_at   | Smarcad1   | SWI/SNF-related, matrix-associated actin-dependent regulator of chromatin, subfamily a, containing DEAD/H box | 2085.137556 | 1371.581738 |
| 1452282_at   | Med26      | mediator complex subunit 26                                                                                   | 675.4336933 | 745.7801233 |
| 1452322_a_at | Brwd1      | bromodomain and WD repeat domain containing 1                                                                 | 37315.47254 | 28754.26841 |
| 1452364_at   | Suz12      | suppressor of zeste 12 homolog (Drosophila)                                                                   | 1133.96433  | 1559.198758 |
| 1452550_a_at | Fmr1       | fragile X mental retardation syndrome 1 homolog                                                               | 3553.39154  | 2642.999528 |
| 1452596_at   | Polr2k     | polymerase (RNA) II (DNA directed) polypeptide K                                                              | 15810.91071 | 20662.10434 |
| 1452659_at   | Dek        | DEK oncogene (DNA binding)                                                                                    | 18480.22568 | 26073.7468  |
| 1452697_at   | Ctdp1      | CTD (carboxy-terminal domain, RNA polymerase II, polypeptide A) phosphatase, subunit                          | 3754.254533 | 3148.026663 |
| 1452856_at   | Crebzf     | CREB/ATF bZIP transcription factor                                                                            | 3311.612874 | 4353.431114 |
| 1452880_at   | Znhit3     | zinc finger, HIT type 3                                                                                       | 2754.93769  | 3521.993801 |
| 1452916_at   | Wbp7       | WW domain binding protein 7                                                                                   | 917.3369155 | 708.3957719 |
| 1452932_at   | Zbtb7a     | zinc finger and BTB domain containing 7a                                                                      | 2934.831669 | 2063.253255 |
| 1452945_at   | Zfp157     | zinc finger protein 157                                                                                       | 342.7724963 | 255.2214025 |
| 1452970_at   | Zmym2      | zinc finger, MYM-type 2                                                                                       | 14683.77039 | 11145.89717 |
| 1453034_at   | Zfp251     | zinc finger protein 251                                                                                       | 9218.713861 | 8508.71658  |
| 1453097_a_at | Ubtf       | upstream binding transcription factor, RNA polymerase                                                         | 7575.44133  | 10181.16486 |
| 1453161_at   | Med13      | mediator complex subunit 13                                                                                   | 1931.065269 | 1260.253456 |
| 1453200_at   | Rai1       | retinoic acid induced 1                                                                                       | 955.2516112 | 661.3101443 |
| 1453209_at   | Brf1       | BRF1 homolog, subunit of RNA polymerase III transcription initiation factor IIIb (S. cerevisiae)              | 428.2444686 | 629.8156475 |
| 1453579_at   | Phf12      | PHD finger protein 12                                                                                         | 3823.124836 | 4430.814795 |
| 1453751_at   | Dhx38      | DEAH (Asp-Glu-Ala-His) box polypeptide 3                                                                      | 6583.677384 | 8293.309632 |
| 1454305_at   | Cbx3       | chromobox homolog 3 (Drosophila HP1 gamma)                                                                    | 271.6325477 | 218.6930029 |
| 1454652_at   | Zranb2     | zinc finger, RAN-binding domain containing                                                                    | 7235.336089 | 5606.194349 |
| 1454670_at   | Rere       | arginine glutamic acid dipeptide (RE) repeats                                                                 | 5425.165172 | 4256.73186  |
| 1454765_at   | Gtf3c3     | general transcription factor IIIC, polypeptide 3                                                              | 865.3724162 | 627.2496367 |
| 1454776_at   | Ehmt1      | euchromatic histone methyltransferase 1                                                                       | 4337.86584  | 4233.797611 |
| 1454826_at   | 1454826_at | Unknown                                                                                                       | 1933.891024 | 2223.378058 |
| 1454896_at   | Rbpj       | recombination signal binding protein for immunoglobulin kappa J region                                        | 1039.937039 | 844.0349701 |
| 1454960_at   | Smad3      | MAD homolog 3 (Drosophila)                                                                                    | 5958.892669 | 4331.181323 |
| 1455042_at   | 1455042_at | Unknown                                                                                                       | 6600.837267 | 7294.612074 |
| 1455092_at   | Zfp207     | zinc finger protein 207                                                                                       | 19424.07872 | 13373.70129 |
| 1455154_at   | Gli3       | GLI-Kruppel family member GLI3                                                                                | 4318.685907 | 2893.233968 |
| 1455175_at   | Phf13      | PHD finger protein 13                                                                                         | 4789.156099 | 5891.379023 |
| 1455187_at   | 1455187_at | Unknown                                                                                                       | 3007.857845 | 3473.917071 |
| 1455210_at   | Zhx2       | zinc fingers and homeoboxes 2                                                                                 | 848.8160238 | 813.4109486 |
| 1455222_a_at | Ubp1       | upstream binding protein 1                                                                                    | 11266.90524 | 8546.204654 |
| 1455243_at   | Brpf3      | bromodomain and PHD finger containing, 3                                                                      | 2642.200702 | 1752.628899 |
| 1455246_at   | Smarcc1    | SWI/SNF related, matrix associated, actin dependent regulator of chromatin, subfamily c, member 1             | 20200.97538 | 13969.29939 |
| 1455273_at   | Zbtb6      | zinc finger and BTB domain containing 6                                                                       | 2139.460015 | 1541.254806 |
| 1455323_at   | Rbak       | RB-associated KRAB repressor                                                                                  | 1405.16228  | 1080.359424 |
| 1455552_at   | Snapc4     | small nuclear RNA activating complex, polypeptide 4                                                           | 279.7063983 | 363.6069966 |
| 1455625_at   | Taf10      | TAF10 RNA polymerase II, TATA box binding protein (TBP)-associated factor                                     | 884.2038879 | 676.7618279 |
| 1455633_at   | Zfp647     | zinc finger protein 647                                                                                       | 434.5151375 | 345.1457824 |
| 1455655_a_at | Tardbp     | TAR DNA binding protein                                                                                       | 12837.61865 | 16038.86741 |
| 1455696_a_at | Prpf4b     | PRP4 pre-mRNA processing factor 4 homolog B (yeast)                                                           | 17495.05679 | 12447.11513 |
| 1455831_at   | Fus        | fusion, derived from t(12;16) malignant liposarcoma (human)                                                   | 30585.51483 | 22899.96883 |
| 1455979_at   | Arid1b     | AT rich interactive domain 1B (SWI-like)                                                                      | 4594.82001  | 4650.276027 |
| 1456037_x_at | Preb       | prolactin regulatory element binding                                                                          | 22041.36857 | 25025.4059  |
| 1456227_x_at | Rbbp7      | retinoblastoma binding protein 7                                                                              | 67965.27152 | 64729.09977 |
| 1456260_at   | Rbbp4      | retinoblastoma binding protein 4                                                                              | 3836.122557 | 5345.460635 |
| 1456308_x_at | Trim28     | tripartite motif-containing 28                                                                                | 29543.62239 | 39721.627   |
| 1456405_at   | Dido1      | death inducer-obliteritor 1                                                                                   | 6249.326149 | 4942.892263 |
| 1456420_at   | Arid4a     | AT rich interactive domain 4A (RBP1-like)                                                                     | 3676.495967 | 4773.909809 |
| 1456507_at   | Zfp454     | zinc finger protein 454                                                                                       | 351.2669983 | 270.7770662 |
| 1456576_x_at | Cnot2      | CCR4-NOT transcription complex, subunit 2                                                                     | 2866.3829   | 2235.012653 |
| 1456699_s_at | Ythdc1     | YTH domain containing 1                                                                                       | 12833.55472 | 14194.31452 |
| 1456753_at   | Foxo4      | forkhead box O4                                                                                               | 3742.779234 | 2639.864088 |
| 1456789_at   | Zfp462     | zinc finger protein 462                                                                                       | 4861.739201 | 3640.294583 |
| 1457002_at   | Zfp408     | zinc finger protein 408                                                                                       | 11980.58345 | 11392.21699 |
| 1457051_at   | 1457051_at | Unknown                                                                                                       | 219.3612469 | 292.2382639 |
| 1457268_at   | Dot1l      | DOT1-like, histone H3 methyltransferase (S. cerevisiae)                                                       | 1582.557797 | 1686.486942 |
| 1457285_at   | Zfp187     | zinc finger protein 187                                                                                       | 12181.10199 | 10682.90434 |
| 1457397_at   | Klf14      | Kruppel-like factor 14                                                                                        | 1133.062778 | 1006.456056 |
| 1457900_at   | Ascc3      | activating signal cointegrator 1 complex subunit 3                                                            | 8778.462085 | 7870.344193 |
| 1459773_x_at | Snip1      | Smad nuclear interacting protein 1                                                                            | 658.54944   | 783.6308882 |

## CaudalHalf\_expression

|              |          |                                                                                |             |             |
|--------------|----------|--------------------------------------------------------------------------------|-------------|-------------|
| 1459998_at   | Zfp407   | zinc finger protein 407                                                        | 719.2037189 | 533.0083509 |
| 1460171_at   | Cops5    | COP9 (constitutive photomorphogenic) homolog, subunit 5 (Arabidopsis thaliana) | 15485.27089 | 14966.57733 |
| 1460252_s_at | Zfp105   | zinc finger protein 105                                                        | 706.7731363 | 655.2804253 |
| 1460364_at   | Gtf2ird1 | general transcription factor II I repeat domain-containing 1                   | 1738.422475 | 1304.676271 |
| 1460398_at   | Phf8     | PHD finger protein 8                                                           | 585.3640985 | 615.6940574 |
| 1460402_at   | Brpf1    | bromodomain and PHD finger containing, 1                                       | 1011.861631 | 1161.787449 |
| 1460403_at   | Psp1     | PC4 and SFRS1 interacting protein 1                                            | 2548.198059 | 3203.47189  |
| 1460547_a_at | Hnmpk    | heterogeneous nuclear ribonucleoprotein K                                      | 156178.5646 | 143754.6031 |
| 1460648_at   | Nr2f6    | nuclear receptor subfamily 2, group F, member 6                                | 386.0674743 | 557.7638239 |
| 1460692_at   | Ehmt2    | euchromatic histone lysine N-methyltransferase 2                               | 11648.12384 | 16605.32048 |
| 1460716_a_at | Cbfb     | core binding factor beta                                                       | 40851.39667 | 41089.41567 |
